# Supplementary material for: Knowledge, attitudes, and practices related to TB among the general population of Ethiopia: Findings from a national cross-sectional survey
Source: PubMed Central journal article supplement (PMC6816561; doi:10.1371/journal.pone.0224196), 2019-10-28
Supplement: pone.0224196.s001.pdf [file pone.0224196.s001.pdf]

Supporting table 1 Sample size estimation for KAP study in Ethiopia

| Domain       | Indicator                                                                                   | Proportion (p) | Margin of error (w) | Confidence level | Design effect  | Sample size  |
|--------------|---------------------------------------------------------------------------------------------|----------------|---------------------|------------------|----------------|--------------|
|              | % of women in the GP who report that TB is spread through air by coughing                   | 55.6%*         | 5%                  | 95%              | 2              | 759          |
|              | % of men in the GP who report TB is spreads by coughing                                     | 65.0%*         | 5%                  | 95%              | 2              | 699          |
|              | <b>Total</b>                                                                                |                |                     |                  |                | <b>1,458</b> |
| Knowledge    | % of women in the GP who believe that TB can be cured                                       | 79.6%*         | 4%                  | 95%              | 2              | 780          |
|              | % of men in the GP who believe that TB can be cured                                         | 89.3%*         | 4%                  | 95%              | 2              | 459          |
|              | <b>Total</b>                                                                                |                |                     |                  |                | <b>1,239</b> |
|              | % of TB patients who have good knowledge on TB                                              | 50%            | 5%                  | 95%              | 2              | 767          |
|              | % of family members of TB patients who have good knowledge on TB                            | 50%            | 5%                  | 95%              | 2              | 767          |
|              | % of women in the GP who would want a family member's TB kept secret                        | 25.8%*         | 4%                  | 95%              | 2              | 919          |
|              | % of men in the GP who would want a family member's TB kept secret                          | 17.8%*         | 4%                  | 95%              | 2              | 703          |
| <b>Total</b> |                                                                                             |                |                     |                  | <b>1,622**</b> |              |
| Attitu       | % of TB patients who would not mind sharing other people that they've TB                    | 50%            | 5%                  | 95%              | 2              | 767**        |
|              | % of TB patients' family members who would not want a family member's TB status kept secret | 50%            | 5%                  | 95%              | 2              | 767          |
| Practice     | % of GP who have good practice related to TB services                                       | 50%            | 5%                  | 95%              | 2              | 768**        |
|              | % of TB patients who have good practice related to TB services                              | 50%            | 5%                  | 95%              | 2              | 767          |
|              | % of family members of TB patients who have good practice related to TB services            | 50%            | 5%                  | 95%              | 2              | 767          |

\* Source-EDHS 2011 # GP - general population \*\* 10% was added for the sample size calculated to adjust for non-response rate.
