# Supplementary material for: Knowledge, attitudes, and practices related to TB among the general population of Ethiopia: Findings from a national cross-sectional survey
Source: PubMed Central journal article supplement (PMC6816561; doi:10.1371/journal.pone.0224196), 2019-10-28
Supplement: pone.0224196.s002.pdf [file pone.0224196.s002.pdf]

**Annex 1: Data collection tools**

KNOWLEDGE, ATTITUDE, AND PRACTICE (KAP) RELATED TO TUBERCULOSIS AMONG THE GENERAL POPULATION, CURRENT TB PATIENTS, AND FAMILIES OF CURRENT TB PATIENTS IN ETHIOPIA

MODULE 1: QUESTIONNAIRE FOR GENERAL POPULATION SURVEY

**SECTION 1: IDENTIFICATION**

| S.N | Question | Coding category                                                                                                                                                                                                                                                                                                                      |
|-----|----------|--------------------------------------------------------------------------------------------------------------------------------------------------------------------------------------------------------------------------------------------------------------------------------------------------------------------------------------|
| 101 | Region   | Oromia.....1<br>Amhara.....2<br>SNNP.....3<br>Tigrai.....4<br>Benshangul Gumuz.....5<br>Gambella.....6<br>Addis Ababa.....7<br>Dire Dawa.....8<br>Harari.....9                                                                                                                                                                       |
| 102 | Zone     | West Hararge..... 11<br>North Shewa..... 12<br>East Shewa .....13<br>West Guji .....14<br>North Shewa..... 21<br>West Gojjam..... 22<br>North Wollo..... 23<br>Gondar City .....24<br>Sidama .....31<br>Segen area..... 32<br>Sheka .....33<br>Siltie..... 34<br>Western Tigrai..... 41<br>Eastern Tigrai.....42<br>Kamashi..... .51 |

|                              |                       |                                                                                                                                         |
|------------------------------|-----------------------|-----------------------------------------------------------------------------------------------------------------------------------------|
|                              |                       | Agnuak .....61<br>Bole..... 71<br>Akaki Kality .....72<br>Gullele .....73<br>Addis Ketema.....74<br>Dire Dawa..... 81<br>Harari .....91 |
| 103                          | Woreda                |                                                                                                                                         |
| 104                          | Kebele name           |                                                                                                                                         |
| 105                          | Setting               | Rural.....1<br>Urban.....2                                                                                                              |
| 106                          | House number          |                                                                                                                                         |
| <i>Location of the house</i> |                       |                                                                                                                                         |
| 107                          | Altitude (Meters)     |                                                                                                                                         |
| 108                          | Latitude (degrees N)  |                                                                                                                                         |
| 109                          | Longitude (degrees E) |                                                                                                                                         |

### SECTION 2: INTERVIEWER VISITS

| S.N | Question              | Coding category                                                                          |
|-----|-----------------------|------------------------------------------------------------------------------------------|
| 201 | Date of visit (D/M/Y) |                                                                                          |
| 202 | Interviewer code      |                                                                                          |
| 203 | Result of the visit   | Completed.....1<br>No competent respondent at home at time of visit...2<br>Refused.....3 |
| 204 | Supervisor code       |                                                                                          |

### SECTION 3: SOCIO-DEMOGRAPHIC AND ECONOMIC CHARACTERISTICS

| S.N | Questions and filters | Coding category (Fill) | Skip |
|-----|-----------------------|------------------------|------|
| 401 | Gender                | Male...1<br>Female...2 |      |
| 402 | Age in completed      | _____Years             |      |

|     |                                           |                                                                                                                                                                     |  |
|-----|-------------------------------------------|---------------------------------------------------------------------------------------------------------------------------------------------------------------------|--|
|     | years                                     |                                                                                                                                                                     |  |
| 403 | Relationship to the head of the household | Head...1<br>Spouse...2<br>Son/Daughter...3<br>Other relative...4<br>Non-relative...5                                                                                |  |
| 404 | Religion                                  | Orthodox Christian.....1<br>Muslim.....2<br>Protestant.....3<br>Catholic.....4<br>Other (specify).....96                                                            |  |
| 405 | Marital Status                            | Married...1<br>Living together...2<br>Divorced/ Separated...3<br>Widowed...4<br>Never married/never lived together...5                                              |  |
| 406 | Educational status                        | Not able to read and write...1<br>Read and write only...2<br>Primary...3<br>Secondary...4<br>Above secondary...5                                                    |  |
| 407 | Occupation                                | Employed...1<br>House wife...2<br>Farmer...3<br>Daily laborer...4<br>Trader...5<br>Student ...6<br>No job/dependent...7<br>House maid...8<br>Other (Specify).....96 |  |
| 408 | Total number of household members         |                                                                                                                                                                     |  |

|     |                                                                                                          |                                                                                                                                                                                                                                                                                                                                                                                                                    |                            |
|-----|----------------------------------------------------------------------------------------------------------|--------------------------------------------------------------------------------------------------------------------------------------------------------------------------------------------------------------------------------------------------------------------------------------------------------------------------------------------------------------------------------------------------------------------|----------------------------|
| 409 | What is the main source of drinking water for members of your household?                                 | Piped water piped into the dwelling.....1<br>Piped water piped to yard/plot.....2<br>Bottled water.....3<br>Piped water public tap/standpipe.....4<br>Borehole.....5<br>Protected dug well.....6<br>Unprotected dug well.....7<br>Protected spring.....8<br>Unprotected spring.....9<br>Rain water.....10<br>Tanker truck.....11<br>Cart with small tank.....12<br>Surface water.....13<br>Other (specify)..... 96 | If 1,2, or 3, skip to Q411 |
| 410 | How long does it take to go there, get water, and come back? (in minutes)                                |                                                                                                                                                                                                                                                                                                                                                                                                                    |                            |
| 411 | What kind of toilet facility do members of your household usually use?                                   | Flush to piped sewer system.....1<br>Flush to septic tank . . . . . 2<br>Flush to pit latrine . . . . . 3<br>Flush to somewhere else . . . . . 4<br>Flush, don't know where . . . . . 5<br>Ventilated improved pit latrine (VIP). . . . . 6<br>Pit latrine with slab . . . . . 7<br>Pit latrine without slab/open pit . . . . . 8<br>No facility/bush/field . . . . . 9<br>Other (specify).....96                  | If 9 or 96, skip to Q414   |
| 412 | Do you share this toilet facility with other households?                                                 | Yes . . . . . 1<br>No . . . . . 0                                                                                                                                                                                                                                                                                                                                                                                  | If 0, skip to Q414         |
| 413 | How many households use this toilet facility? (Write 98 if he/she doesn't know the number of households) |                                                                                                                                                                                                                                                                                                                                                                                                                    |                            |
| 414 | Does your household have electricity?                                                                    | Yes.....1<br>No.....0                                                                                                                                                                                                                                                                                                                                                                                              |                            |
| 415 | Does your household have a                                                                               | Yes.....1                                                                                                                                                                                                                                                                                                                                                                                                          |                            |

|     |                                                                                |                                                                                                                                                                                         |  |
|-----|--------------------------------------------------------------------------------|-----------------------------------------------------------------------------------------------------------------------------------------------------------------------------------------|--|
|     | wall clock?                                                                    | No.....0                                                                                                                                                                                |  |
| 416 | Does your household have a radio?                                              | Yes.....1<br>No.....0                                                                                                                                                                   |  |
| 417 | Does your household have a television?                                         | Yes.....1<br>No.....0                                                                                                                                                                   |  |
| 418 | Does any member of your household have a mobile telephone?                     | Yes.....1<br>No.....0                                                                                                                                                                   |  |
| 419 | Does your household have a non-mobile telephone?                               | Yes.....1<br>No.....0                                                                                                                                                                   |  |
| 420 | Does your household have a refrigerator?                                       | Yes.....1<br>No.....0                                                                                                                                                                   |  |
| 421 | Does your household have a table?                                              | Yes.....1<br>No.....0                                                                                                                                                                   |  |
| 422 | Does your household have chairs?                                               | Yes.....1<br>No.....0                                                                                                                                                                   |  |
| 423 | Does your household have a bed with cotton/sponge/spring mattress?             | Yes.....1<br>No.....0                                                                                                                                                                   |  |
| 424 | Does your household have an electric stove for baking enjera or bread (mitad)? | Yes.....1<br>No.....0                                                                                                                                                                   |  |
| 425 | Does your household have a kerosene lamp/pressure lamp?                        | Yes.....1<br>No.....0                                                                                                                                                                   |  |
| 426 | What type of fuel does your household mainly use for cooking?                  | Electricity .....1<br>Liquefied Petroleum Gas (LPG) ..... 2<br>Natural gas/biogas/kerosine..... 3<br>Charcoal .....4<br>Wood .....5<br>Straw/shrubs/grass .....6<br>Animal dung ..... 7 |  |

|     |                                                                                |                                                                                                                                                                                                                                                                                               |  |
|-----|--------------------------------------------------------------------------------|-----------------------------------------------------------------------------------------------------------------------------------------------------------------------------------------------------------------------------------------------------------------------------------------------|--|
|     |                                                                                | No food cooked in household . . . . . 95<br>Other (specify).....96                                                                                                                                                                                                                            |  |
| 427 | Is the cooking usually done in the house, in a separate building, or outdoors? | In the house . . . . . 1<br>In a separate building/room..... 2<br>Outdoors . . . . . 3<br>Other (specify).....96                                                                                                                                                                              |  |
| 428 | What is the main material of the floor?                                        | Earth/sand . . . . . 1<br>Dung . . . . . 2<br>Unpolished wood..... 3<br>Polished wood . . . . .4<br>Cement . . . . . 5<br>Ceramic tiles . . . . . 6<br>Carpet . . . . . 7<br>Other (specify).....96                                                                                           |  |
| 429 | What is the main material of the roof?                                         | No roof . . . . . 1<br>Thatch/leaf/mud . . . . . 2<br>Plastic sheets . . . . . 3<br>Wood . . . . .4<br>Corrugated iron /metal . . . . . 5<br>Cement/concrete . . . . . 6<br>Other (specify).....96                                                                                            |  |
| 430 | What is the main material of the exterior walls?                               | No walls . . . . . 1<br>Cane/bamboo . . . . .2<br>Bamboo/wood with mud..... 3<br>Stone with mud . . . . . 4<br>Uncovered adobe (earthen brick)..... 5<br>Cardboard . . . . . 6<br>Cement . . . . . 7<br>Stone with lime/cement . . . . . 8<br>Bricks . . . . . 9<br>Cement blocks . . . . .10 |  |

|     |                                                                                                                                                                         |                            |                    |
|-----|-------------------------------------------------------------------------------------------------------------------------------------------------------------------------|----------------------------|--------------------|
|     |                                                                                                                                                                         | Covered adobe . . . . . 11 |                    |
|     |                                                                                                                                                                         | Other (specify).....96     |                    |
| 431 | How many rooms in this household are used for sleeping?                                                                                                                 |                            |                    |
| 432 | Does any member of this household own a bicycle?                                                                                                                        | Yes.....1<br>No.....0      |                    |
| 433 | Does any member of this household own a motorcycle?                                                                                                                     | Yes.....1<br>No.....0      |                    |
| 434 | Does any member of this household own an animal-drawn cart?                                                                                                             | Yes.....1<br>No.....0      |                    |
| 435 | Does any member of this household own a car or truck?                                                                                                                   | Yes.....1<br>No.....0      |                    |
| 436 | Does any member of this household own any agricultural land?                                                                                                            | Yes.....1<br>No.....0      | If 0, skip to Q441 |
| 437 | How many hectares of agricultural land do members of this household own?<br><br>1 hectare = 10,000 m <sup>2</sup> e.g 100 meter x 100 meter                             | Yes.....1<br>No.....0      |                    |
| 438 | What is the annual production of crops/ grains in quintal                                                                                                               |                            |                    |
| 439 | Does any member of this household own coffee plants?                                                                                                                    | Yes.....1<br>No.....0      | If 0, skip to Q441 |
| 440 | How many kilograms of coffee do you get on average each year?                                                                                                           |                            |                    |
| 441 | Does this household own any livestock, herds, other farm animals, or poultry?                                                                                           | Yes.....1<br>No.....0      | If 0, skip to Q449 |
| 442 | How many milk cows, oxen or bulls do this household own?<br><br>If none, enter '0';<br><br>If between 1-94, write the exact number;<br><br>If more than 95, enter '95'; |                            |                    |

|     |                                                                                                                                                                                      |                       |
|-----|--------------------------------------------------------------------------------------------------------------------------------------------------------------------------------------|-----------------------|
|     | If unknown, enter '98'.                                                                                                                                                              |                       |
| 443 | How many horses, donkeys, or mules do this household own? If none, enter '0';<br>If between 1-94, write the exact number;<br>If more than 95, enter '95';<br>If unknown, enter '98'. |                       |
| 444 | How many camels do this household own? If none, enter '0'; If between 1-94, write the exact number;<br>If more than 95, enter '95'; If unknown, enter '98'.                          |                       |
| 445 | How many goats do this household own? If none, enter '0'; If between 1-94, write the exact number;<br>If more than 95, enter '95'; If unknown, enter '98'.                           |                       |
| 446 | How many sheep do this household own? If none, enter '0'; If between 1-94, write the exact number;<br>If more than 95, enter '95'; If unknown, enter '98'.                           |                       |
| 447 | How many chickens do this household own? If none, enter '0'; If between 1-94, write the exact number;<br>If more than 95, enter '95'; If unknown, enter '98'.                        |                       |
| 448 | How many beehives do this household own? If none, enter '0'; If between 1-94, write the exact number;<br>If more than 95, enter '95'; If unknown, enter '98'.                        |                       |
| 449 | Does any member of this household have a bank or microfinance saving account?                                                                                                        | Yes.....1<br>No.....0 |



SECTION 4: KNOWLEDGE AND PERCEPTION ON TB

| S.N | Questions and filters                                                                                                                | Coding category (Fill)                                                                                                                                                                                                                                                                                                                             | Skip            |
|-----|--------------------------------------------------------------------------------------------------------------------------------------|----------------------------------------------------------------------------------------------------------------------------------------------------------------------------------------------------------------------------------------------------------------------------------------------------------------------------------------------------|-----------------|
| 501 | Have you ever heard of an illness called TB?                                                                                         | Yes.....1<br>No.....0                                                                                                                                                                                                                                                                                                                              | If no, End here |
| 502 | Where did you first learn/hear about TB?<br><br>Record all mentioned.                                                                | Newspapers and magazines....1<br>Radio....2<br>TV....3<br>Billboards...4<br>Brochures, posters and other printed materials...5<br>Health extension workers...6<br>Other health workers...7<br>Health development armies...8<br>Family, friends, neighbours and colleagues...9<br>Religious leaders...10<br>Teachers...11<br>Other (Specify).....96 |                 |
| 503 | In your opinion, how serious a disease is TB?                                                                                        | Very serious...1<br>Somewhat serious...2<br>Not very serious...3                                                                                                                                                                                                                                                                                   |                 |
| 504 | How serious a problem do you think TB is in your community?                                                                          | Very serious...1<br>Somewhat serious...2<br>Not very serious...3                                                                                                                                                                                                                                                                                   |                 |
| 505 | What is the cause of TB? (Don't read the options to him/her . Check all the options mention by him/her)<br><br>Probe: Anything else? | Germs....1<br>Evil eye....2<br>Satan/witchcraft....3<br>Other (Specify).....96<br>Don't know.....99                                                                                                                                                                                                                                                |                 |
| 506 | How can a person get TB? (Don't read the options to him/her . Check all the options mention by him/her)                              | Through the air when coughing or sneezing ....1<br>Through sharing utensils...2<br>Through touching a person with TB.....3                                                                                                                                                                                                                         |                 |

|     |                                                                                                                                                                           |                                                                                                                                                                                                                                                                                        |  |
|-----|---------------------------------------------------------------------------------------------------------------------------------------------------------------------------|----------------------------------------------------------------------------------------------------------------------------------------------------------------------------------------------------------------------------------------------------------------------------------------|--|
|     | <p>Probe: Any other?</p>                                                                                                                                                  | <p>Through food or water.....4</p> <p>Through sexual contact with a person with TB....5</p> <p>Through mosquito bites....6</p> <p>Through drinking un-boiled milk....7</p> <p>Exposure to cold....8</p> <p>Other (Specify).....96</p> <p>Don't know.....99</p>                         |  |
| 507 | <p>In your opinion, who can be infected with TB? (Don't read the options to him/her . Check all the options mention by him/her)</p> <p>Probe: Any other person?</p>       | <p>Anybody...1</p> <p>Only poor people...2</p> <p>Only homeless people....3</p> <p>Only alcoholics...4</p> <p>Only drug users...5</p> <p>Only people living with HIV/AIDS...6</p> <p>Only people who have been in prison...7</p> <p>Other (Specify).....96</p>                         |  |
| 508 | <p>What are the body parts affected with TB? (Don't read the options to him/her . Check all the options mention by him/her)</p> <p>Probe: Any other part of the body?</p> | <p>Lung....1</p> <p>Intestine....2</p> <p>Bone....3</p> <p>Lymph nodes....4</p> <p>Other (Specify).....96</p> <p>Don't know.....99</p>                                                                                                                                                 |  |
| 509 | <p>What symptoms will a person with TB have? (Don't read the options to him/her . Check all the options mention by him/her)</p> <p>Probe: Anything else?</p>              | <p>Cough.....1</p> <p>Persistent cough (greater that two weeks).....2</p> <p>Weight loss.....3</p> <p>Poor appetite...4</p> <p>Night sweating.....5</p> <p>Chest pain.....6</p> <p>Fever.....7</p> <p>Blood in the sputum....7</p> <p>Shortness of breath...9</p> <p>Fatigue....10</p> |  |

|     |                                                                                                                                                                                |                                                                                                                                                                                                                                          |                          |
|-----|--------------------------------------------------------------------------------------------------------------------------------------------------------------------------------|------------------------------------------------------------------------------------------------------------------------------------------------------------------------------------------------------------------------------------------|--------------------------|
|     |                                                                                                                                                                                | Swelling.....11<br>Other (Specify).....96<br>Don't know.....99                                                                                                                                                                           |                          |
| 510 | Is TB preventable disease?                                                                                                                                                     | Yes.....1<br>No.....0<br>Don't know.....99                                                                                                                                                                                               | If 0 or 99, skip to Q512 |
| 511 | What possible TB transmission prevention methods are there?<br><br>(Don't read the options to him/her . Check all the options mention by him/her)<br><br>Probe: Anything else? | Avoiding cough in front of people....1<br>Safe disposal of sputum....2<br>Ventilation of living room...3<br>Avoiding close contact with TB patients...4<br>Vaccination for children.....5<br>Other (Specify).....96<br>Don't know.....99 |                          |
| 512 | Can TB be cured?                                                                                                                                                               | Yes.....1<br>No.....0<br>Don't know.....99                                                                                                                                                                                               | If 0 or 99, skip to Q514 |
| 513 | How can someone with TB be cured?                                                                                                                                              | Herbal remedies...1<br>Home rest without medicine...2<br>Praying...3<br>Specific drugs given by health professionals...4<br>Other (Specify).....96<br>Don't know.....99                                                                  |                          |
| 514 | Do you think that you are well informed about TB (on its prevention and control)?                                                                                              | Yes.....1<br>No.....0                                                                                                                                                                                                                    |                          |
| 515 | Do you wish to get more information about TB?                                                                                                                                  | Yes.....1<br>No.....0                                                                                                                                                                                                                    | If 0, Skip to Q517       |
| 516 | What are the sources of information that you think can most effectively reach people like you with information on TB? (Please choose the three most effective sources.)        | Newspapers and magazines...1<br>Radio...2<br>TV...3<br>Billboards...4<br>Brochures, posters and other printed materials...5<br>Health extension workers...6<br>Other health workers...7                                                  |                          |

|     |                                                                             |                                                                                                                                                                                                                                                                                                          |                    |
|-----|-----------------------------------------------------------------------------|----------------------------------------------------------------------------------------------------------------------------------------------------------------------------------------------------------------------------------------------------------------------------------------------------------|--------------------|
|     |                                                                             | Health development armies...8<br>Family, friends, neighbours and colleagues...9<br>Religious leaders...10<br>Teachers...11<br>Other (Specify).....96                                                                                                                                                     |                    |
| 517 | Have you ever heard about multidrug resistant TB?                           | Yes.....1<br>No.....0                                                                                                                                                                                                                                                                                    | If 0, Skip to Q601 |
| 518 | What do you know about multidrug resistant TB?<br><br>Probe: Anything else? | It is created when TB patients do not take anti-TB drugs regularly.....1<br><br>It is a dangerous form of TB...2<br><br>Can be transmitted to family and friends....3<br><br>Its treatment lasts for at least 2 years...4<br><br>Other (specify).....5<br><br>Can not explain multidrug resistant TB...6 |                    |

SECTION 5: ATTITUDE AND STIGMA RELATED QUESTIONS

| S.N | Questions and filters                                                                                      | Coding category (Fill)                                                                                                                                          | Skip |
|-----|------------------------------------------------------------------------------------------------------------|-----------------------------------------------------------------------------------------------------------------------------------------------------------------|------|
| 601 | Do you think you can get TB?                                                                               | Yes.....1<br>No.....0                                                                                                                                           |      |
| 602 | What would be your reaction if you were found out that you have TB?<br><br>(Check all that are mentioned.) | Cope with it...1<br><br>Fear...1<br><br>Surprise...2<br><br>Shame...3<br><br>Embarrassment...4<br><br>Sadness or hopelessness...5<br><br>Other (Specify).....96 |      |
| 603 | Who would you talk to about your illness if you had TB?<br><br>(Check all that are mentioned.)             | Doctor or other medical worker...1<br><br>Spouse...2<br><br>Parent...3<br><br>Children...4<br><br>Other family member...5<br><br>Close friend...6               |      |

|     |                                                                                                |                                                                                                                                                                                                                                                                                                                                                                        |                      |
|-----|------------------------------------------------------------------------------------------------|------------------------------------------------------------------------------------------------------------------------------------------------------------------------------------------------------------------------------------------------------------------------------------------------------------------------------------------------------------------------|----------------------|
|     |                                                                                                | No one...7<br>Other (Specify).....96                                                                                                                                                                                                                                                                                                                                   |                      |
| 604 | What would you do if you thought you had symptoms of TB? (Check all that are mentioned)        | Go to public health facility...1<br>Go to private health facility...2<br>Go to pharmacy...3<br>Go to spiritual/ traditional healer...4<br>Pursue other self-treatment options (herbs, etc.)...5<br>Other (Specify).....96<br>Don't know.....99                                                                                                                         | If 1,2, Skip to Q606 |
| 605 | If you would not go to the health facility, what is the reason? (Check all that are mentioned) | Not sure where to go...1<br>Cost...2<br>Difficulties with transportation/distance to health facility...3<br>Do not trust health workers...4<br>Do not like attitude of health workers...5<br>Cannot leave work (overlapping work hours with health facility working hours)...6<br>Do not want to find out that something is really wrong...7<br>Other (Specify).....96 |                      |
| 606 | If you had symptoms of TB, at what point would you go to the health facility?                  | Immediately ..... 1<br>In few days.....2<br>One to two weeks....3<br>After two weeks....4<br>I will not go to health facility....5<br>Other (Specify).....96                                                                                                                                                                                                           |                      |
| 607 | How expensive do you think TB diagnosis and treatment is in this country?                      | It is free of charge...1<br>It is reasonably priced...2<br>It is somewhat/moderately expensive...3<br>It is very expensive...4<br>Don't know.....99                                                                                                                                                                                                                    |                      |
| 608 | Do you know people who have/had TB?                                                            | Yes.....1<br>No.....0                                                                                                                                                                                                                                                                                                                                                  |                      |
| 609 | Which statement is closest to your feeling about people with TB disease?                       | I feel compassion and desire to help....1<br>I feel compassion but I tend to stay away from these people....2                                                                                                                                                                                                                                                          |                      |

|     |                                                                                                                                                                           |                                                                                                                                                                                                                                                         |  |
|-----|---------------------------------------------------------------------------------------------------------------------------------------------------------------------------|---------------------------------------------------------------------------------------------------------------------------------------------------------------------------------------------------------------------------------------------------------|--|
|     | (Read the following choices and check one answer only)                                                                                                                    | <p>It is their problem and I do not want to get TB by trying to help them...3</p> <p>I fear them because they may infect me...4</p> <p>I have no particular feeling...5</p> <p>Other (Specify).....96</p>                                               |  |
| 610 | In your community, how is a person who has TB usually regarded/treated?                                                                                                   | <p>Most people reject him or her...1</p> <p>Most people are friendly, but they generally try to avoid him or her...2</p> <p>The community mostly supports and helps him or her...3</p> <p>I don't have experience...4</p> <p>Other (Specify).....96</p> |  |
| 611 | If yourself got tuberculosis or TB, you would want it to remain secret. (Read the options to the participant and inform him/her to select one option only)                | <p>Strongly disagree.....1</p> <p>Disagree.....2</p> <p>Indifferent.....3</p> <p>Agree.....4</p> <p>Strongly agree.....5</p>                                                                                                                            |  |
| 612 | If a member of your family got tuberculosis or TB, you would want it to remain secret. (Read the options to the participant and inform him/her to select one option only) | <p>Strongly disagree.....1</p> <p>Disagree.....2</p> <p>Indifferent.....3</p> <p>Agree.....4</p> <p>Strongly agree.....5</p>                                                                                                                            |  |
| 613 | If you had TB, others would think less of you. (Read the options to the participant and inform him/her to select one option only)                                         | <p>Strongly disagree.....1</p> <p>Disagree.....2</p> <p>Indifferent.....3</p> <p>Agree.....4</p> <p>Strongly agree.....5</p>                                                                                                                            |  |
| 614 | If you had TB, you would be ashamed or embarrassed. (Read the options to the participant and inform him/her to select one option only)                                    | <p>Strongly disagree.....1</p> <p>Disagree.....2</p> <p>Indifferent.....3</p> <p>Agree.....4</p> <p>Strongly agree.....5</p>                                                                                                                            |  |
| 615 | If you had TB, others would avoid you. (Read the options to the participant and inform him/her to                                                                         | <p>Strongly disagree.....1</p>                                                                                                                                                                                                                          |  |

|     |                                                                                                                                                                                                                            |                                                                                                       |                                                                  |
|-----|----------------------------------------------------------------------------------------------------------------------------------------------------------------------------------------------------------------------------|-------------------------------------------------------------------------------------------------------|------------------------------------------------------------------|
|     | select one option only)                                                                                                                                                                                                    | Disagree.....2<br>Indifferent.....3<br>Agree.....4<br>Strongly agree.....5                            |                                                                  |
| 616 | Do you have partner?                                                                                                                                                                                                       | Yes.....1<br>No.....0                                                                                 | If 1, skip to Q618                                               |
| 617 | Only for the respondent who has no partner -If you had TB, you would have a problem of finding a partner for marriage even after cure. ((Read the options to the participant and inform him/her to select one option only) | Strongly disagree.....1<br>Disagree.....2<br>Indifferent.....3<br>Agree.....4<br>Strongly agree.....5 |                                                                  |
| 618 | Only for the respondent who has partner- If you had TB, your partner would refuse to have sex with you. ((Read the options to the participant and inform him/her to select one option only)                                | Strongly disagree.....1<br>Disagree.....2<br>Indifferent.....3<br>Agree.....4<br>Strongly agree.....5 | Those who responded 0 to Q616 shall not respond to this question |
| 619 | If you had TB, you would be asked to stay away from a social group. (Read the options to the participant and inform him/her to select one option only)                                                                     | Strongly disagree.....1<br>Disagree.....2<br>Indifferent.....3<br>Agree.....4<br>Strongly agree.....5 |                                                                  |
| 620 | If you had TB, you would not disclose even to a confidant (Somebody to who secrets are usually told). ((Read the options to the participant and inform him/her to select one option only)                                  | Strongly disagree.....1<br>Disagree.....2<br>Indifferent.....3<br>Agree.....4<br>Strongly agree.....5 |                                                                  |
| 621 | If you had TB, you would think less of yourself. (Read the options to the participant and inform him/her to select one option only)                                                                                        | Strongly disagree.....1<br>Disagree.....2<br>Indifferent.....3<br>Agree.....4<br>Strongly agree.....5 |                                                                  |
| 622 | If you had TB, others would think less of your family. (Read the                                                                                                                                                           | Strongly disagree.....1                                                                               |                                                                  |

|     |                                                                                                                                            |                                                                                                       |                    |
|-----|--------------------------------------------------------------------------------------------------------------------------------------------|-------------------------------------------------------------------------------------------------------|--------------------|
|     | options to the participant and inform him/her to select one option only)                                                                   | Disagree.....2<br>Indifferent.....3<br>Agree.....4<br>Strongly agree.....5                            |                    |
| 623 | Do you have children?                                                                                                                      | Yes....1<br>No....0                                                                                   | If '0' skip to 701 |
| 624 | If you had TB, it would be a problem for your children. (Read the options to the participant and inform him/her to select one option only) | Strongly disagree.....1<br>Disagree.....2<br>Indifferent.....3<br>Agree.....4<br>Strongly agree.....5 |                    |



## SECTION 6: PRACTICE RELATED QUESTIONS

| S.N | Questions and filters                                                                   | Coding category (Fill)                                                                                                                                                                                                                                                                                                                                           | Skip               |
|-----|-----------------------------------------------------------------------------------------|------------------------------------------------------------------------------------------------------------------------------------------------------------------------------------------------------------------------------------------------------------------------------------------------------------------------------------------------------------------|--------------------|
| 701 | Have you ever been diagnosed with TB?                                                   | Yes.....1<br>No.....0                                                                                                                                                                                                                                                                                                                                            | If 0, Skip to Q707 |
| 702 | When have you been diagnosed with TB?<br>(Month/Year- Ethiopian Calendar)               |                                                                                                                                                                                                                                                                                                                                                                  |                    |
| 703 | Where was your first point of care at that time?                                        | Sought care from health institutions....1<br><br>Sought care from pharmacies...2<br><br>Contacted the HDA to advise me to seek care from the health institutions....3<br><br>Contacted the HEW to advise me to seek care from health institutions....4<br><br>Visited spiritual/ traditional healers...5<br><br>I did nothing....6<br><br>Other (specify)_____96 |                    |
| 704 | Where were you first diagnosed with TB?                                                 | Health center...1<br><br><i>Public hospital...2</i><br><br><i>Private hospital.....3</i><br><br><i>Private clinic.....4</i><br><br>Other (specify).....96                                                                                                                                                                                                        |                    |
| 705 | Did you complete the treatment?                                                         | Yes.....1<br>No.....0                                                                                                                                                                                                                                                                                                                                            |                    |
| 706 | How satisfied were you with the health service provided?                                | Very satisfied....1<br><br>Somehow satisfied....2<br><br>Indifferent....3<br><br>Somehow dissatisfied...4<br><br>Very dissatisfied....5                                                                                                                                                                                                                          |                    |
| 707 | In the past one year, have you ever experienced cough for 2 weeks or more?              | Yes.....1<br>No.....0                                                                                                                                                                                                                                                                                                                                            | If 0, Skip to Q709 |
| 708 | What did you do when you had cough for 2 weeks or more? (more than one answer possible) | Sought care from health institutions....1<br><br>Sought care from pharmacies...2<br><br>Contacted the HDA to advise me to seek care from                                                                                                                                                                                                                         |                    |

|     |                                                                                                                                    |                                                                                                                                                                                                                                                                                                                                                                                                                                                                                                                                        |                    |
|-----|------------------------------------------------------------------------------------------------------------------------------------|----------------------------------------------------------------------------------------------------------------------------------------------------------------------------------------------------------------------------------------------------------------------------------------------------------------------------------------------------------------------------------------------------------------------------------------------------------------------------------------------------------------------------------------|--------------------|
|     |                                                                                                                                    | <p>the health institutions....3</p> <p>Contacted the HEW to advise me to seek care from health institutions....4</p> <p>Visited spiritual/ traditional healers...5</p> <p>I did nothing....6</p> <p>Other (specify).....96</p>                                                                                                                                                                                                                                                                                                         |                    |
| 709 | In the past one year, have you ever encountered a person who has cough for 2 weeks or more in your community?                      | <p>Yes.....1</p> <p>No.....0</p>                                                                                                                                                                                                                                                                                                                                                                                                                                                                                                       | If 0, skip to Q711 |
| 710 | What did you do when you encountered a person who has cough for 2 weeks or more in your community? (more than one answer possible) | <p>I advised him/her to seek care from public health institutions....1</p> <p>I advised him/her to seek care from private health facilities...2</p> <p>I advised him/her to seek care from pharmacies...3</p> <p>I informed the HDA to advise him/her to seek care from the health institutions....4</p> <p>I informed the HEW to advise him/her to seek care from health institutions.....5</p> <p>I advised him/her to seek care from spiritual/ traditional healers...6</p> <p>I did nothing....7</p> <p>Other (specify).....96</p> |                    |
| 711 | Were you involved in the past on identification of TB cases?                                                                       | <p>Yes.....1</p> <p>No.....0</p>                                                                                                                                                                                                                                                                                                                                                                                                                                                                                                       | If 0, skip to Q713 |
| 712 | What did you do?                                                                                                                   | <p>Referred family member to health facility...1</p> <p>Referred community member to health facility...2</p> <p>Involved in TB screening at community level...3</p> <p>Other (Specify).....96</p>                                                                                                                                                                                                                                                                                                                                      |                    |
| 713 | Were you involved in the past in tracing of TB treatment defaulters?                                                               | <p>Yes.....1</p> <p>No.....0</p>                                                                                                                                                                                                                                                                                                                                                                                                                                                                                                       |                    |
| 714 | Have you advised parents of children under-one year to have their infants vaccinated for TB?                                       | <p>Yes.....1</p> <p>No.....0</p>                                                                                                                                                                                                                                                                                                                                                                                                                                                                                                       |                    |
| 715 | Were there circumstances when you advised TB patients to take their drugs properly based on the advice of health professionals?    | <p>Yes.....1</p> <p>No.....0</p>                                                                                                                                                                                                                                                                                                                                                                                                                                                                                                       |                    |
| 716 | Have you ever acted as TB treatment supporter for a TB patient in observing TB patients taking                                     | <p>Yes.....1</p>                                                                                                                                                                                                                                                                                                                                                                                                                                                                                                                       |                    |

|     |                                                                                                                               |                                                                                                                                                                                                                                                                                                                                                                 |                    |
|-----|-------------------------------------------------------------------------------------------------------------------------------|-----------------------------------------------------------------------------------------------------------------------------------------------------------------------------------------------------------------------------------------------------------------------------------------------------------------------------------------------------------------|--------------------|
|     | oral treatment?                                                                                                               | No.....0                                                                                                                                                                                                                                                                                                                                                        |                    |
| 717 | In the past one year, <i>was</i> there any family member who has cough for 2 or more weeks?                                   | Yes.....1<br>No.....0                                                                                                                                                                                                                                                                                                                                           | If 0, Skip to Q719 |
| 718 | What did you do when your family member had cough for 2 or more weeks?                                                        | We did nothing.....1<br>We took him/her to public health institutions for investigation...2<br>We took him/her to private health institution for investigation...3<br>We gave him/her medicine without consulting health professionals...4<br>We took him/her to Pharmacy...5<br>We took him/her to Spiritual/ Traditional healer...6<br>Other (specify).....96 |                    |
| 719 | Have you ever been involved in a community activity engaged in awareness creation, TB prevention and TB case finding efforts? | Yes.....1<br>No.....0                                                                                                                                                                                                                                                                                                                                           | If 0, End here.    |
| 720 | Who organized the community activity?                                                                                         | <i>Health Development Army (HDA).....1</i><br><i>HEW/Health post.....2</i><br><i>Kebele...3</i><br><i>Health center/hospital staff...4</i><br><i>Woreda health office....5</i><br><i>NGO...6</i><br><i>Community organization like Idir...7</i><br><i>Other (Specify).....96</i>                                                                                |                    |

End of questions

Thank you very much for your cooperation

MODULE 3: QUESTIONNAIRE FOR KAP SURVEY – FAMILIES OF TB PATIENTS

SECTION 1: IDENTIFICATION

| S.N | Question | Coding category                                                                                                                                                                                                                                                                                                                                                                                                   |
|-----|----------|-------------------------------------------------------------------------------------------------------------------------------------------------------------------------------------------------------------------------------------------------------------------------------------------------------------------------------------------------------------------------------------------------------------------|
| 101 | Region   | Oromia.....1<br>Amhara.....2<br>SNNP.....3<br>Tigrai.....4<br>Benshangul Gumuz.....5<br>Gambella.....6<br>Addis Ababa.....7<br>Dire Dawa.....8<br>Harari.....9                                                                                                                                                                                                                                                    |
| 102 | Zone     | West Hararge..... 11<br>North Shewa..... 12<br>East Shewa .....13<br>West Guji .....14<br>North Shewa..... 21<br>West Gojjam..... 22<br>North Wollo..... 23<br>Gondar City .....24<br>Sidama .....31<br>Segen area..... 32<br>Sheka .....33<br>Siltie..... 34<br>Western Tigrai..... 41<br>Eastern Tigrai.....42<br>Kamashi..... .51<br>Agnuak .....61<br>Bole..... 71<br>Akaki Kality .....72<br>Gullele .....73 |

|                                      |                                                                        |                                                            |
|--------------------------------------|------------------------------------------------------------------------|------------------------------------------------------------|
|                                      |                                                                        | Addis Ketema.....74<br>Dire Dawa..... 81<br>Harari .....91 |
| 103                                  | Woreda                                                                 |                                                            |
| 104                                  | Health center name                                                     |                                                            |
| 105                                  | Name of kebele where the health center is located                      |                                                            |
| 106                                  | Setting of the kebele where the health center is located               | Rural.....1<br>Urban.....2                                 |
| 107                                  | Name of the kebele where the family member of TB patient comes from    |                                                            |
| 108                                  | Setting of the kebele where the family member of TB patient comes from | Rural.....1<br>Urban.....2                                 |
| <i>Location of the health center</i> |                                                                        |                                                            |
| 109                                  | Altitude (Meters)                                                      |                                                            |
| 110                                  | Latitude (degrees N)                                                   |                                                            |
| 111                                  | Longitude (degrees E)                                                  |                                                            |

SECTION 2: INTERVIEWER VISITS

| S.N | Question                  | Coding category                  |
|-----|---------------------------|----------------------------------|
| 201 | Date of interview (D/M/Y) |                                  |
| 202 | Interviewer code          |                                  |
| 203 | Result of the interview   | Completed.....1<br>Refused.....2 |
| 204 | Supervisor code           |                                  |

SECTION 3: SOCIO-DEMOGRAPHIC AND ECONOMIC CHARACTERISTICS

| S.N | Questions and filters | Coding category (Fill) | Skip |
|-----|-----------------------|------------------------|------|
|-----|-----------------------|------------------------|------|

|     |                                           |                                                                                                                                           |  |
|-----|-------------------------------------------|-------------------------------------------------------------------------------------------------------------------------------------------|--|
| 401 | Gender                                    | Male...1<br>Female...2                                                                                                                    |  |
| 402 | Age in completed years                    | _____ Years                                                                                                                               |  |
| 403 | Relationship to the head of the household | Head...1<br>Spouse...2<br>Son/Daughter...3<br>Other relative...4<br>Non-relative...5                                                      |  |
| 404 | Religion                                  | Orthodox Christian.....1<br>Muslim.....2<br>Protestant.....3<br>Catholic.....4<br>Other (specify).....96                                  |  |
| 405 | Marital Status                            | Married...1<br>Living together...2<br>Divorced/ Separated...3<br>Widowed...4<br>Never married/never lived together...5                    |  |
| 406 | Educational status                        | Not able to read and write...1<br>Read and write only...2<br>Primary...3<br>Secondary...4<br>Above secondary...5                          |  |
| 407 | Occupation                                | Employed...1<br>House wife...2<br>Farmer...3<br>Daily laborer...4<br>Trader...5<br>Student ...6<br>No job/dependent...7<br>House maid...8 |  |

|     |                                                                           |                                                                                                                                                                                                                                                                                                                                                                                                                    |                            |
|-----|---------------------------------------------------------------------------|--------------------------------------------------------------------------------------------------------------------------------------------------------------------------------------------------------------------------------------------------------------------------------------------------------------------------------------------------------------------------------------------------------------------|----------------------------|
|     |                                                                           | Other (Specify).....96                                                                                                                                                                                                                                                                                                                                                                                             |                            |
| 408 | Total number of household members                                         |                                                                                                                                                                                                                                                                                                                                                                                                                    |                            |
| 409 | Total number of children under-one year old in the family                 |                                                                                                                                                                                                                                                                                                                                                                                                                    |                            |
| 410 | Total number of children under-five years in the family                   |                                                                                                                                                                                                                                                                                                                                                                                                                    |                            |
| 411 | Total number of people age 5 years to less than 18 years in the family    |                                                                                                                                                                                                                                                                                                                                                                                                                    |                            |
| 412 | Total number of adults (18 years and above) in the family                 |                                                                                                                                                                                                                                                                                                                                                                                                                    |                            |
| 413 | What is the main source of drinking water for members of your household?  | Piped water piped into the dwelling.....1<br>Piped water piped to yard/plot.....2<br>Bottled water.....3<br>Piped water public tap/standpipe.....4<br>Borehole.....5<br>Protected dug well.....6<br>Unprotected dug well.....7<br>Protected spring.....8<br>Unprotected spring.....9<br>Rain water.....10<br>Tanker truck.....11<br>Cart with small tank.....12<br>Surface water.....13<br>Other (specify)..... 96 | If 1,2, or 3, skip to Q415 |
| 414 | How long does it take to go there, get water, and come back? (in minutes) |                                                                                                                                                                                                                                                                                                                                                                                                                    |                            |
| 415 | What kind of toilet facility do members of your household usually use?    | Flush to piped sewer system.....1<br>Flush to septic tank . . . . .2<br>Flush to pit latrine . . . . .3<br>Flush to somewhere else . . . . .4<br>Flush, don't know where . . . . .5<br>Ventilated improved pit latrine (VIP) . . .6<br>Pit latrine with slab . . . . .7<br>Pit latrine without slab/open pit . . . 8<br>No facility/bush/field . . . . .9<br>Other (specify).....96                                | If 9 or 96, skip to Q418   |

|     |                                                                                                          |                                                                                                            |                    |
|-----|----------------------------------------------------------------------------------------------------------|------------------------------------------------------------------------------------------------------------|--------------------|
| 416 | Do you share this toilet facility with other households?                                                 | Yes . . . . . 1<br>No . . . . . 0                                                                          | If 0, skip to Q418 |
| 417 | How many households use this toilet facility? (Write 98 if he/she doesn't know the number of households) |                                                                                                            |                    |
| 418 | Does your household have electricity?                                                                    | Yes.....1<br>No.....0                                                                                      |                    |
| 419 | Does your household have a wall clock?                                                                   | Yes.....1<br>No.....0                                                                                      |                    |
| 420 | Does your household have a radio?                                                                        | Yes.....1<br>No.....0                                                                                      |                    |
| 421 | Does your household have a television?                                                                   | Yes.....1<br>No.....0                                                                                      |                    |
| 422 | Does any member of your household have a mobile telephone?                                               | Yes.....1<br>No.....0                                                                                      |                    |
| 423 | Does your household have a non-mobile telephone?                                                         | Yes.....1<br>No.....0                                                                                      |                    |
| 424 | Does your household have a refrigerator?                                                                 | Yes.....1<br>No.....0                                                                                      |                    |
| 425 | Does your household have a table?                                                                        | Yes.....1<br>No.....0                                                                                      |                    |
| 426 | Does your household have chairs?                                                                         | Yes.....1<br>No.....0                                                                                      |                    |
| 427 | Does your household have a bed with cotton/sponge/spring mattress?                                       | Yes.....1<br>No.....0                                                                                      |                    |
| 428 | Does your household have an electric stove for baking enjera or bread (mitad)?                           | Yes.....1<br>No.....0                                                                                      |                    |
| 429 | Does your household have a kerosene lamp/pressure lamp?                                                  | Yes.....1<br>No.....0                                                                                      |                    |
| 430 | What type of fuel does your household mainly use for cooking?                                            | Electricity . . . . . 1<br>Liquefied Petroleum Gas (LPG) . . . . . 2<br>Natural gas/biogas/kerosine..... 3 |                    |



|     |                                                                                |                                                                                                                                                                                                     |  |
|-----|--------------------------------------------------------------------------------|-----------------------------------------------------------------------------------------------------------------------------------------------------------------------------------------------------|--|
|     |                                                                                | Charcoal . . . . .4<br>Wood . . . . .5<br>Straw/shrubs/grass . . . . .6<br>Animal dung . . . . .7<br>No food cooked in household . . . . .95<br>Other (specify).....96                              |  |
| 431 | Is the cooking usually done in the house, in a separate building, or outdoors? | In the house . . . . . 1<br>In a separate building/room..... 2<br>Outdoors . . . . . 3<br>Other (specify).....96                                                                                    |  |
| 432 | What is the main material of the floor?                                        | Earth/sand . . . . . 1<br>Dung . . . . . 2<br>Unpolished wood..... 3<br>Polished wood . . . . .4<br>Cement . . . . . 5<br>Ceramic tiles . . . . . 6<br>Carpet . . . . . 7<br>Other (specify).....96 |  |
| 433 | What is the main material of the roof?                                         | No roof . . . . . 1<br>Thatch/leaf/mud . . . . . 2<br>Plastic sheets . . . . . 3<br>Wood . . . . .4<br>Corrugated iron /metal ..... 5<br>Cement/concrete . . . . . 6<br>Other (specify).....96      |  |
| 434 | What is the main material of the exterior walls?                               | No walls . . . . . 1<br>Cane/bamboo .....2<br>Bamboo/wood with mud..... 3<br>Stone with mud . . . . . 4<br>Uncovered adobe (earthen brick)..... 5<br>Cardboard . . . . . 6                          |  |

|     |                                                                                                                                           |                                                                                                                                              |                    |
|-----|-------------------------------------------------------------------------------------------------------------------------------------------|----------------------------------------------------------------------------------------------------------------------------------------------|--------------------|
|     |                                                                                                                                           | Cement .....7<br>Stone with lime/cement .....8<br>Bricks .....9<br>Cement blocks .....10<br>Covered adobe ..... 11<br>Other (specify).....96 |                    |
| 435 | How many rooms in your household are used for sleeping?                                                                                   |                                                                                                                                              |                    |
| 436 | Does any member of your household own a bicycle?                                                                                          | Yes.....1<br>No.....0                                                                                                                        |                    |
| 437 | Does any member of your household own a motorcycle?                                                                                       | Yes.....1<br>No.....0                                                                                                                        |                    |
| 438 | Does any member of your household own an animal-drawn cart?                                                                               | Yes.....1<br>No.....0                                                                                                                        |                    |
| 439 | Does any member of your household own a car or truck?                                                                                     | Yes.....1<br>No.....0                                                                                                                        |                    |
| 440 | Does any member of your household own any agricultural land?                                                                              | Yes.....1<br>No.....0                                                                                                                        | If 0, skip to Q445 |
| 441 | How many hectares of agricultural land do members of your household own?<br><br>1 hectare=10,000 m <sup>2</sup> e.g 100 meter x 100 meter | Yes.....1<br>No.....0                                                                                                                        |                    |
| 442 | What is the annual production of crops/ grains in quintal                                                                                 |                                                                                                                                              |                    |
| 443 | Does any member of your household own coffee plants?                                                                                      | Yes.....1<br>No.....0                                                                                                                        | If 0, skip to Q445 |
| 444 | How many kilograms of coffee do you get on average each year?                                                                             |                                                                                                                                              |                    |
| 445 | Does your household own any livestock, herds, other farm animals, or poultry?                                                             | Yes.....1<br>No.....0                                                                                                                        | If 0, skip to Q453 |

|     |                                                                                                                                                                                    |                       |
|-----|------------------------------------------------------------------------------------------------------------------------------------------------------------------------------------|-----------------------|
| 446 | How many milk cows, oxen or bulls do your household own?<br><br>If none, enter '0'; If between 1-94, write the exact number; If more than 95, enter '95'; If unknown, enter '98'.  |                       |
| 447 | How many horses, donkeys, or mules do your household own?<br><br>If none, enter '0'; If between 1-94, write the exact number; If more than 95, enter '95'; If unknown, enter '98'. |                       |
| 448 | How many camels do your household own?<br><br>If none, enter '0'; If between 1-94, write the exact number; If more than 95, enter '95'; If unknown, enter '98'.                    |                       |
| 449 | How many goats do your household own?<br><br>If none, enter '0'; If between 1-94, write the exact number; If more than 95, enter '95'; If unknown, enter '98'.                     |                       |
| 450 | How many sheep do your household own?<br><br>If none, enter '0'; If between 1-94, write the exact number; If more than 95, enter '95'; If unknown, enter '98'.                     |                       |
| 451 | How many chickens do your household own?<br><br>If none, enter '0'; If between 1-94, write the exact number; If more than 95, enter '95'; If unknown, enter '98'.                  |                       |
| 452 | How many beehives do your household own?<br><br>If none, enter '0'; If between 1-94, write the exact number; If more than 95, enter '95'; If unknown, enter '98'.                  |                       |
| 453 | Does any member of your household have a bank or microfinance saving account?                                                                                                      | Yes.....1<br>No.....0 |

SECTION 4: KNOWLEDGE AND PERCEPTION ON TB

| S.N | Questions and filters                                                 | Coding category (Fill)                                                | Skip            |
|-----|-----------------------------------------------------------------------|-----------------------------------------------------------------------|-----------------|
| 501 | Have you ever heard of an illness called TB?                          | Yes.....1<br>No.....0                                                 | If no, End here |
| 502 | Where did you first learn/hear about TB?<br><br>Record all mentioned. | Newspapers and magazines...1<br>Radio...2<br>TV...3<br>Billboards...4 |                 |

|     |                                                                                                                                            |                                                                                                                                                                                                                                                                                                                                                                                  |  |
|-----|--------------------------------------------------------------------------------------------------------------------------------------------|----------------------------------------------------------------------------------------------------------------------------------------------------------------------------------------------------------------------------------------------------------------------------------------------------------------------------------------------------------------------------------|--|
|     |                                                                                                                                            | <p>Brochures, posters and other printed materials...5</p> <p>Health extension workers...6</p> <p>Other health workers...7</p> <p>Health development armies...8</p> <p>Family, friends, neighbours and colleagues...9</p> <p>Religious leaders...10</p> <p>Teachers...11</p> <p>Other (Specify).....96</p>                                                                        |  |
| 503 | In your opinion, how serious a disease is TB?                                                                                              | <p>Very serious...1</p> <p>Somewhat serious...2</p> <p>Not very serious...3</p>                                                                                                                                                                                                                                                                                                  |  |
| 504 | How serious a problem do you think TB is in your community?                                                                                | <p>Very serious...1</p> <p>Somewhat serious...2</p> <p>Not very serious...3</p>                                                                                                                                                                                                                                                                                                  |  |
| 505 | <p>What is the cause of TB? (Don't read the options to him/her. Check all the options mention by him/her)</p> <p>Probe: Anything else?</p> | <p>Germs....1</p> <p>Evil eye....2</p> <p>Satan/witchcraft....3</p> <p>Other (Specify).....96</p> <p>Don't know.....99</p>                                                                                                                                                                                                                                                       |  |
| 506 | <p>How can a person get TB? (Don't read the options to him/her . Check all the options mention by him/her)</p> <p>Probe: Any other?</p>    | <p>Through the air when coughing or sneezing ....1</p> <p>Through sharing utensils....2</p> <p>Through touching a person with TB.....3</p> <p>Through food or water.....4</p> <p>Through sexual contact with a person with TB....5</p> <p>Through mosquito bites....6</p> <p>Through drinking un-boiled milk....7</p> <p>Exposure to cold....8</p> <p>Other (Specify).....96</p> |  |

|     |                                                                                                                                                                           |                                                                                                                                                                                                                                                                                                                                                                      |             |
|-----|---------------------------------------------------------------------------------------------------------------------------------------------------------------------------|----------------------------------------------------------------------------------------------------------------------------------------------------------------------------------------------------------------------------------------------------------------------------------------------------------------------------------------------------------------------|-------------|
|     |                                                                                                                                                                           | Don't know.....99                                                                                                                                                                                                                                                                                                                                                    |             |
| 507 | <p>In your opinion, who can be infected with TB? (Don't read the options to him/her . Check all the options mention by him/her)</p> <p>Probe: Any other person?</p>       | <p>Anybody...1</p> <p>Only poor people...2</p> <p>Only homeless people....3</p> <p>Only alcoholics...4</p> <p>Only drug users...5</p> <p>Only people living with HIV/AIDS...6</p> <p>Only people who have been in prison...7</p> <p>Other (Specify).....96</p>                                                                                                       |             |
| 508 | <p>What are the body parts affected with TB? (Don't read the options to him/her . Check all the options mention by him/her)</p> <p>Probe: Any other part of the body?</p> | <p>Lung....1</p> <p>Intestine....2</p> <p>Bone....3</p> <p>Lymph nodes...4</p> <p>Other (Specify).....96</p> <p>Don't know.....99</p>                                                                                                                                                                                                                                |             |
| 509 | <p>What symptoms will a person with TB have? (Don't read the options to him/her . Check all the options mention by him/her)</p> <p>Probe: Anything else?</p>              | <p>Cough.....1</p> <p>Persistent cough (greater that two weeks).....2</p> <p>Weight loss.....3</p> <p>Poor appetite...4</p> <p>Night sweating.....5</p> <p>Chest pain.....6</p> <p>Fever.....7</p> <p>Blood in the sputum...8</p> <p>Shortness of breath....9</p> <p>Fatigue....10</p> <p>Swelling.....11</p> <p>Other (Specify).....96</p> <p>Don't know.....99</p> |             |
| 510 | Is TB preventable disease?                                                                                                                                                | Yes.....1                                                                                                                                                                                                                                                                                                                                                            | If 0 or 99, |

|     |                                                                                                                                                                                |                                                                                                                                                                                                                                                                            |                          |
|-----|--------------------------------------------------------------------------------------------------------------------------------------------------------------------------------|----------------------------------------------------------------------------------------------------------------------------------------------------------------------------------------------------------------------------------------------------------------------------|--------------------------|
|     |                                                                                                                                                                                | No.....0<br>Don't know.....99                                                                                                                                                                                                                                              | skip to Q512             |
| 511 | What possible TB transmission prevention methods are there?<br><br>(Don't read the options to him/her . Check all the options mention by him/her)<br><br>Probe: Anything else? | Avoiding cough in front of people....1<br>Safe disposal of sputum....2<br>Ventilation of living room....3<br>Avoiding close contact with TB patients....4<br>Vaccination for children.....5<br>Other (Specify).....96<br>Don't know.....99                                 |                          |
| 512 | Can TB be cured?                                                                                                                                                               | Yes.....1<br>No.....0<br>Don't know.....99                                                                                                                                                                                                                                 | If 0 or 99, skip to Q514 |
| 513 | How can someone with TB be cured?                                                                                                                                              | Herbal remedies...1<br>Home rest without medicine...2<br>Praying...3<br>Specific drugs given by health professionals...4<br>Other (Specify).....96<br>Don't know.....99                                                                                                    |                          |
| 514 | Do you think that you are well informed about TB (on its prevention and control)?                                                                                              | Yes.....1<br>No.....0                                                                                                                                                                                                                                                      |                          |
| 515 | Do you wish to get more information about TB?                                                                                                                                  | Yes.....1<br>No.....0                                                                                                                                                                                                                                                      | If 0, Skip to Q601       |
| 516 | What are the sources of information that you think can most effectively reach people like you with information on TB? (Please choose the three most effective sources.)        | Newspapers and magazines...1<br>Radio...2<br>TV...3<br>Billboards...4<br>Brochures, posters and other printed materials...5<br>Health extension workers...6<br>Other health workers...7<br>Health development armies...8<br>Family, friends, neighbours and colleagues...9 |                          |

|     |                                                                             |                                                                                                                                                                                                                                                                                       |                    |
|-----|-----------------------------------------------------------------------------|---------------------------------------------------------------------------------------------------------------------------------------------------------------------------------------------------------------------------------------------------------------------------------------|--------------------|
|     |                                                                             | Religious leaders...10<br>Teachers...11<br>Other (Specify).....96                                                                                                                                                                                                                     |                    |
| 517 | Have you ever heard about multidrug resistant TB?                           | Yes.....1<br>No.....0                                                                                                                                                                                                                                                                 | If 0, Skip to Q601 |
| 518 | What do you know about multidrug resistant TB?<br><br>Probe: Anything else? | It is created when TB patients do not take anti-TB drugs regularly.....1<br>It is a dangerous form of TB...2<br>Can be transmitted to family and friends....3<br>Its treatment lasts for at least 2 years....4<br>Other (specify).....5<br>Can not explain multidrug resistant TB...6 |                    |

SECTION 5: ATTITUDE AND STIGMA RELATED QUESTIONS

| S.N | Questions and filters                                                                                      | Coding category (Fill)                                                                                                                                                | Skip |
|-----|------------------------------------------------------------------------------------------------------------|-----------------------------------------------------------------------------------------------------------------------------------------------------------------------|------|
| 601 | Do you think you can get TB?                                                                               | Yes.....1<br>No.....0                                                                                                                                                 |      |
| 602 | What would be your reaction if you were found out that you have TB?<br><br>(Check all that are mentioned.) | Cope with it...1<br>Fear...1<br>Surprise...2<br>Shame...3<br>Embarrassment...4<br>Sadness or hopelessness...5<br>Other (Specify).....96                               |      |
| 603 | Who would you talk to about your illness if you had TB?<br><br>(Check all that are mentioned.)             | Doctor or other medical worker...1<br>Spouse...2<br>Parent...3<br>Children...4<br>Other family member...5<br>Close friend...6<br>No one...7<br>Other (Specify).....96 |      |

|     |                                                                                                                                    |                                                                                                                                                                                                                                                                                                                                                                        |                      |
|-----|------------------------------------------------------------------------------------------------------------------------------------|------------------------------------------------------------------------------------------------------------------------------------------------------------------------------------------------------------------------------------------------------------------------------------------------------------------------------------------------------------------------|----------------------|
| 604 | What would you do if you thought you had symptoms of TB? (Check all that are mentioned)                                            | Go to public health facility...1<br>Go to private health facility...2<br>Go to pharmacy...3<br>Go to spiritual/ traditional healer...4<br>Pursue other self-treatment options (herbs, etc.)...5<br>Other (Specify).....96<br>Don't know.....99                                                                                                                         | If 1,2, Skip to Q606 |
| 605 | If you would not go to the health facility, what is the reason? (Check all that are mentioned)                                     | Not sure where to go...1<br>Cost...2<br>Difficulties with transportation/distance to health facility...3<br>Do not trust health workers...4<br>Do not like attitude of health workers...5<br>Cannot leave work (overlapping work hours with health facility working hours)...6<br>Do not want to find out that something is really wrong...7<br>Other (Specify).....96 |                      |
| 606 | If you had symptoms of TB, at what point would you go to the health facility?                                                      | Immediately ..... 1<br>In few days....2<br>One to two weeks....3<br>After two weeks....4<br>I will not go to health facility....5<br>Other (Specify)_____96                                                                                                                                                                                                            |                      |
| 607 | How expensive do you think TB diagnosis and treatment is in this country?                                                          | It is free of charge...1<br>It is reasonably priced...2<br>It is somewhat/moderately expensive...3<br>It is very expensive...4<br>Don't know.....99                                                                                                                                                                                                                    |                      |
| 608 | Do you know people who have/had TB?                                                                                                | Yes.....1<br>No.....0                                                                                                                                                                                                                                                                                                                                                  |                      |
| 609 | Which statement is closest to your feeling about people with TB disease?<br>(Read the following choices and check one answer only) | I feel compassion and desire to help....1<br>I feel compassion but I tend to stay away from these people....2<br>It is their problem and I cannot get TB by trying to help them....3                                                                                                                                                                                   |                      |



|     |                                                                                                                                                                                  |                                                                                                                                                                                                                      |  |
|-----|----------------------------------------------------------------------------------------------------------------------------------------------------------------------------------|----------------------------------------------------------------------------------------------------------------------------------------------------------------------------------------------------------------------|--|
|     |                                                                                                                                                                                  | <p>I fear them because they may infect me...4</p> <p>I have no particular feeling...5</p> <p>Other (Specify).....96</p>                                                                                              |  |
| 610 | In your community, how is a person who has TB usually regarded/treated?                                                                                                          | <p>Most people reject him or her...1</p> <p>Most people are friendly, but they generally try to avoid him or her...2</p> <p>The community mostly supports and helps him or her...3</p> <p>Other (Specify).....96</p> |  |
| 611 | The fact that your family member has TB should be kept secret from your neighbours/community. (Read the options to the participant and inform him/her to select one option only) | <p>Strongly disagree.....1</p> <p>Disagree.....2</p> <p>Indifferent.....3</p> <p>Agree.....4</p> <p>Strongly agree.....5</p>                                                                                         |  |
| 612 | If you yourself got tuberculosis or TB, you would want it to remain secret. (Read the options to the participant and inform him/her to select one option only)                   | <p>Strongly disagree.....1</p> <p>Disagree.....2</p> <p>Indifferent.....3</p> <p>Agree.....4</p> <p>Strongly agree.....5</p>                                                                                         |  |
| 613 | It is shameful to have a family member with TB. (Read the options to the participant and inform him/her to select one option only)                                               | <p>Strongly disagree.....1</p> <p>Disagree.....2</p> <p>Indifferent.....3</p> <p>Agree.....4</p> <p>Strongly agree.....5</p>                                                                                         |  |
| 614 | If you had TB, others would think less of you. (Read the options to the participant and inform him/her to select one option only)                                                | <p>Strongly disagree.....1</p> <p>Disagree.....2</p> <p>Indifferent.....3</p> <p>Agree.....4</p> <p>Strongly agree.....5</p>                                                                                         |  |
| 615 | If you had TB, you would be ashamed/embarrassed. (Read the options to the participant and inform him/her to select one option only)                                              | <p>Strongly disagree.....1</p> <p>Disagree.....2</p> <p>Indifferent.....3</p> <p>Agree.....4</p>                                                                                                                     |  |

|     |                                                                                                                                                                                                                                   |                                                                                                       |                                                                         |
|-----|-----------------------------------------------------------------------------------------------------------------------------------------------------------------------------------------------------------------------------------|-------------------------------------------------------------------------------------------------------|-------------------------------------------------------------------------|
|     |                                                                                                                                                                                                                                   | Strongly agree.....5                                                                                  |                                                                         |
| 616 | If you had TB, others would avoid you. (Read the options to the participant and inform him/her to select one option only)                                                                                                         | Strongly disagree.....1<br>Disagree.....2<br>Indifferent.....3<br>Agree.....4<br>Strongly agree.....5 |                                                                         |
| 617 | <i>Do you have partner?</i>                                                                                                                                                                                                       | <i>Yes.....1</i><br><i>No.....0</i>                                                                   | <i>If 1, skip to Q619</i>                                               |
| 618 | <i>Only for the respondent who has no partner -If you had TB, you would have a problem of finding a partner for marriage even after cure. ((Read the options to the participant and inform him/her to select one option only)</i> | Strongly disagree.....1<br>Disagree.....2<br>Indifferent.....3<br>Agree.....4<br>Strongly agree.....5 |                                                                         |
| 619 | <i>Only for the respondent who has partner- If you had TB, your partner would refuse to have sex with you. ((Read the options to the participant and inform him/her to select one option only)</i>                                | Strongly disagree.....1<br>Disagree.....2<br>Indifferent.....3<br>Agree.....4<br>Strongly agree.....5 | <i>Those who responded 0 to Q617 shall not respond to this question</i> |
| 620 | If you had TB, you would be asked to stay away from a social group. (Read the options to the participant and inform him/her to select one option only)                                                                            | Strongly disagree.....1<br>Disagree.....2<br>Indifferent.....3<br>Agree.....4<br>Strongly agree.....5 |                                                                         |
| 621 | If you had TB, you would not disclose even to a confidant. (Read the options to the participant and inform him/her to select one option only)                                                                                     | Strongly disagree.....1<br>Disagree.....2<br>Indifferent.....3<br>Agree.....4<br>Strongly agree.....5 |                                                                         |
| 622 | If you had TB, you would think less of yourself. (Read the options to the participant and inform him/her to select one option only)                                                                                               | Strongly disagree.....1<br>Disagree.....2<br>Indifferent.....3<br>Agree.....4                         |                                                                         |

|     |                                                                                                                                            |                                                                                                       |                    |
|-----|--------------------------------------------------------------------------------------------------------------------------------------------|-------------------------------------------------------------------------------------------------------|--------------------|
|     |                                                                                                                                            | Strongly agree.....5                                                                                  |                    |
| 623 | If you had TB, others would think less of your family. (Read the options to the participant and inform him/her to select one option only)  | Strongly disagree.....1<br>Disagree.....2<br>Indifferent.....3<br>Agree.....4<br>Strongly agree.....5 |                    |
| 624 | Do you have children                                                                                                                       | Yes....1<br>No....0                                                                                   | If '0' skip to 701 |
| 625 | If you had TB, it would be a problem for your children. (Read the options to the participant and inform him/her to select one option only) | Strongly disagree.....1<br>Disagree.....2<br>Indifferent.....3<br>Agree.....4<br>Strongly agree.....5 |                    |

SECTION 6: PRACTICE RELATED QUESTIONS

| S.N | Questions and filters                                                                                                                                               | Coding category (Fill)                                                                                                                                                                                                                                                                                                                                    | Skip               |
|-----|---------------------------------------------------------------------------------------------------------------------------------------------------------------------|-----------------------------------------------------------------------------------------------------------------------------------------------------------------------------------------------------------------------------------------------------------------------------------------------------------------------------------------------------------|--------------------|
| 701 | Do you live with the family member who has TB?                                                                                                                      | Yes.....1<br>No.....0                                                                                                                                                                                                                                                                                                                                     |                    |
| 702 | Have you received any counselling or information from health professionals about the prevention and control of TB after your family member is diagnosed to have TB? | Yes.....1<br>No.....0                                                                                                                                                                                                                                                                                                                                     |                    |
| 703 | Are you supporting your family member who has TB to take the TB drugs without interruption?                                                                         | Yes.....1<br>No.....0                                                                                                                                                                                                                                                                                                                                     | If 0, Skip to Q705 |
| 704 | How do you support your family member who has TB in taking the drugs without interruption? (More than one answer possible)                                          | I advise him/her to take the drug without interruption...1<br>I accompany him/her when he/she goes to health institutions to collect/take the drugs...2<br>I observe him/her when he/she take the drug....3<br>I facilitate transportation when going to collect/take the drugs....4<br>I provide financial support to him/her..5<br>Other (specify)...96 |                    |
| 705 | Have you informed any family member that                                                                                                                            | Yes.....1                                                                                                                                                                                                                                                                                                                                                 | If 0, Skip to      |

|     |                                                                                                              |                                                                                                                                                                                       |                    |
|-----|--------------------------------------------------------------------------------------------------------------|---------------------------------------------------------------------------------------------------------------------------------------------------------------------------------------|--------------------|
|     | your family member has TB?                                                                                   | No.....0                                                                                                                                                                              | Q707               |
| 706 | Among the family members, who did you inform that your family member has TB? (More than one answer possible) | Husband.....1<br>Wife.....2<br>Sister.....3<br>Brother.....4<br>Son.....5<br>Daughter.....6<br>Other (specify).....96                                                                 |                    |
| 707 | Have you informed anyone who is not family member that your family member has TB?                            | Yes.....1<br>No.....0                                                                                                                                                                 | If 0, Skip to Q709 |
| 708 | Among people who are not family members, who did you inform that your family member has TB?                  | Religious leaders.....1<br>Neighbors.....2<br>Colleagues at work place.....3<br>Health professional who are not treating the family member who has TB.....4<br>Other (specify).....96 |                    |
| 709 | Have you informed the health extension worker in your kebele that your family member has TB?                 | Yes.....1<br>No.....0                                                                                                                                                                 |                    |
| 710 | Do you support or encourage your family member who has TB to eat more and a variety of food?                 | Yes.....1<br>No.....0                                                                                                                                                                 |                    |
| 711 | How do you support him/her to eat more and have a variety of food? (More than one answer possible)           | I give advice.....1<br>I bring a variety of food from the market...2<br>I provide financial support...3<br>I cook the food and serve him/her...4<br>Other (specify)....96             |                    |
| 712 | Do you open windows/doors in your house after you knew that your family member has TB?                       | Yes.....1<br>No.....0                                                                                                                                                                 |                    |
| 713 | Are you investigated for TB?                                                                                 | Yes.....1<br>No.....0                                                                                                                                                                 |                    |
| 714 | Have you informed other family members to go to the health institutions for investigation?                   | Yes.....1<br>No.....0                                                                                                                                                                 | If 0, Skip to Q716 |

|     |                                                                          |                                             |                        |
|-----|--------------------------------------------------------------------------|---------------------------------------------|------------------------|
| 715 | Did they go for investigation?                                           | Yes.....1<br>No.....0                       |                        |
| 716 | Are there children whose age is under five years in your family?         | Yes.....1<br>No.....0                       | If 0, Skip to Q718     |
| 717 | Did they get preventive therapy for TB?                                  | Yes.....1<br>No.....0                       |                        |
| 718 | Is there a child whose age is under one year in the family?              | Yes.....1<br>No.....0                       | If 0, Skip to Q720     |
| 719 | Is he/she vaccinated for TB?                                             | Yes.....1<br>No.....0                       |                        |
| 720 | Are there family members in the house who have HIV?                      | Yes.....2<br>No.....1<br>I don't know.....0 | If 1 & 0, Skip to Q723 |
| 721 | Did you advise them to get preventive therapy for TB?                    | Yes.....1<br>No.....0                       |                        |
| 722 | Did they get preventive therapy for TB?                                  | Yes.....1<br>No.....0                       |                        |
| 723 | Have you advised family members how they should prevent TB?              | Yes.....1<br>No.....0                       |                        |
| 724 | Do you teach the community on the prevention and control of tuberculosis | Yes.....1<br>No.....0                       |                        |

End of questions

Thank you very much for your cooperation

MODULE 2: QUESTIONNAIRE FOR KAP SURVEY – TB PATIENTS

SECTION 1: IDENTIFICATION

| S.N | Question | Coding category                                                                                                                                                                                                                                                                                                                                                                               |
|-----|----------|-----------------------------------------------------------------------------------------------------------------------------------------------------------------------------------------------------------------------------------------------------------------------------------------------------------------------------------------------------------------------------------------------|
| 101 | Region   | Oromia.....1<br>Amhara.....2<br>SNNP.....3<br>Tigrai.....4<br>Benshangul Gumuz.....5<br>Gambella.....6<br>Addis Ababa.....7<br>Dire Dawa.....8<br>Harari.....9                                                                                                                                                                                                                                |
| 102 | Zone     | West Hararge..... 11<br>North Shewa..... 12<br>East Shewa .....13<br>West Guji .....14<br>North Shewa..... 21<br>West Gojjam..... 22<br>North Wollo..... 23<br>Gondar City .....24<br>Sidama .....31<br>Segen area..... 32<br>Sheka .....33<br>Siltie..... 34<br>Western Tigrai..... 41<br>Eastern Tigrai.....42<br>Kamashi......51<br>Agnuak .....61<br>Bole..... 71<br>Akaki Kality .....72 |

|                                      |                                                          |                                                                               |
|--------------------------------------|----------------------------------------------------------|-------------------------------------------------------------------------------|
|                                      |                                                          | Gullele .....73<br>Addis Ketema.....74<br>Dire Dawa..... 81<br>Harari .....91 |
| 103                                  | Woreda                                                   |                                                                               |
| 104                                  | Health center name                                       |                                                                               |
| 105                                  | Name of kebele where the health center is located        |                                                                               |
| 106                                  | Setting of the kebele where the health center is located | Rural.....1<br>Urban.....2                                                    |
| 107                                  | Name of kebele where the patient comes from              |                                                                               |
| 108                                  | Setting of the kebele where the patient comes from       | Rural.....1<br>Urban.....2                                                    |
| <i>Location of the health center</i> |                                                          |                                                                               |
| 109                                  | Altitude (Meters)                                        |                                                                               |
| 110                                  | Latitude (degrees N)                                     |                                                                               |
| 111                                  | Longitude (degrees E)                                    |                                                                               |

SECTION 2: INTERVIEWER VISITS

| S.N | Question              | Coding category                  |
|-----|-----------------------|----------------------------------|
| 201 | Date of visit (D/M/Y) |                                  |
| 202 | Interviewer code      |                                  |
| 203 | Result of the visit   | Completed.....1<br>Refused.....2 |
| 204 | Supervisor code       |                                  |

SECTION 3: SOCIO-DEMOGRAPHIC AND ECONOMIC CHARACTERISTICS

| S.N | Questions and filters | Coding category (Fill) | Skip |
|-----|-----------------------|------------------------|------|
| 401 | Gender                | Male...1               |      |

|     |                                           |                                                                                                                                                                    |  |
|-----|-------------------------------------------|--------------------------------------------------------------------------------------------------------------------------------------------------------------------|--|
|     |                                           | Female...2                                                                                                                                                         |  |
| 402 | Age in completed years                    | _____ Years                                                                                                                                                        |  |
| 403 | Relationship to the head of the household | Head...1<br>Spouse...2<br>Son/Daughter...3<br>Other relative...4<br>Non-relative...5                                                                               |  |
| 404 | Religion                                  | Orthodox Christian.....1<br>Muslim.....2<br>Protestant.....3<br>Catholic.....4<br>Other (specify).....96                                                           |  |
| 405 | Marital Status                            | Married...1<br>Living together...2<br>Divorced/ Separated...3<br>Widowed...4<br>Never married/never lived together...5                                             |  |
| 406 | Educational status                        | Not able to read and write...1<br>Read and write only...2<br>Primary...3<br>Secondary...4<br>Above secondary...5                                                   |  |
| 407 | Occupation                                | Employed...1<br>House wife...2<br>Farmer...3<br>Daily laborer...4<br>Trader...5<br>Student...6<br>No job/dependent...7<br>House maid...8<br>Other (Specify).....96 |  |



|     |                                                                           |                                                                                                                                                                                                                                                                                                                                                                                                                    |                            |
|-----|---------------------------------------------------------------------------|--------------------------------------------------------------------------------------------------------------------------------------------------------------------------------------------------------------------------------------------------------------------------------------------------------------------------------------------------------------------------------------------------------------------|----------------------------|
| 408 | Total number of household members                                         |                                                                                                                                                                                                                                                                                                                                                                                                                    |                            |
| 409 | Total number of children under-one year old in the family                 |                                                                                                                                                                                                                                                                                                                                                                                                                    |                            |
| 410 | Total number of children under-five years in the family                   |                                                                                                                                                                                                                                                                                                                                                                                                                    |                            |
| 411 | Total number of people age 5 years to less than 18 years in the family    |                                                                                                                                                                                                                                                                                                                                                                                                                    |                            |
| 412 | Total number of adults (18 years and above) in the family                 |                                                                                                                                                                                                                                                                                                                                                                                                                    |                            |
| 413 | What is the main source of drinking water for members of your household?  | Piped water piped into the dwelling.....1<br>Piped water piped to yard/plot.....2<br>Bottled water.....3<br>Piped water public tap/standpipe.....4<br>Borehole.....5<br>Protected dug well.....6<br>Unprotected dug well.....7<br>Protected spring.....8<br>Unprotected spring.....9<br>Rain water.....10<br>Tanker truck.....11<br>Cart with small tank.....12<br>Surface water.....13<br>Other (specify)..... 96 | If 1,2, or 3, skip to Q415 |
| 414 | How long does it take to go there, get water, and come back? (in minutes) |                                                                                                                                                                                                                                                                                                                                                                                                                    |                            |
| 415 | What kind of toilet facility do members of your household usually use?    | Flush to piped sewer system.....1<br>Flush to septic tank . . . . .2<br>Flush to pit latrine . . . . .3<br>Flush to somewhere else . . . . .4<br>Flush, don't know where . . . . .5<br>Ventilated improved pit latrine (VIP). . .6<br>Pit latrine with slab . . . . .7<br>Pit latrine without slab/open pit . . . 8<br>No facility/bush/field . . . . .9<br>Other (specify).....96                                 | If 9 or 96, skip to Q418   |
| 416 | Do you share this toilet facility with other households?                  | Yes . . . . . 1                                                                                                                                                                                                                                                                                                                                                                                                    | If 0, skip                 |

|     |                                                                                                          |                                                                                                                                    |         |
|-----|----------------------------------------------------------------------------------------------------------|------------------------------------------------------------------------------------------------------------------------------------|---------|
|     |                                                                                                          | No . . . . . 0                                                                                                                     | to Q418 |
| 417 | How many households use this toilet facility? (Write 98 if he/she doesn't know the number of households) |                                                                                                                                    |         |
| 418 | Does your household have electricity?                                                                    | Yes.....1<br>No.....0                                                                                                              |         |
| 419 | Does your household have a wall clock?                                                                   | Yes.....1<br>No.....0                                                                                                              |         |
| 420 | Does your household have a radio?                                                                        | Yes.....1<br>No.....0                                                                                                              |         |
| 421 | Does your household have a television?                                                                   | Yes.....1<br>No.....0                                                                                                              |         |
| 422 | Does any member of your household have a mobile telephone?                                               | Yes.....1<br>No.....0                                                                                                              |         |
| 423 | Does your household have a non-mobile telephone?                                                         | Yes.....1<br>No.....0                                                                                                              |         |
| 424 | Does your household have a refrigerator?                                                                 | Yes.....1<br>No.....0                                                                                                              |         |
| 425 | Does your household have a table?                                                                        | Yes.....1<br>No.....0                                                                                                              |         |
| 426 | Does your household have chairs?                                                                         | Yes.....1<br>No.....0                                                                                                              |         |
| 427 | Does your household have a bed with cotton/sponge/spring mattress?                                       | Yes.....1<br>No.....0                                                                                                              |         |
| 428 | Does your household have an electric stove for baking enjera or bread (mitad)?                           | Yes.....1<br>No.....0                                                                                                              |         |
| 429 | Does your household have a kerosene lamp/pressure lamp?                                                  | Yes.....1<br>No.....0                                                                                                              |         |
| 430 | What type of fuel does your household mainly use for cooking?                                            | Electricity . . . . . 1<br>Liquefied Petroleum Gas (LPG) . . . . . 2<br>Natural gas/biogas/kerosine..... 3<br>Charcoal . . . . . 4 |         |

|     |                                                                                |                                                                                                                                                                                                     |  |
|-----|--------------------------------------------------------------------------------|-----------------------------------------------------------------------------------------------------------------------------------------------------------------------------------------------------|--|
|     |                                                                                | Wood . . . . .5<br>Straw/shrubs/grass . . . . .6<br>Animal dung . . . . . 7<br>No food cooked in household . . . . . 95<br>Other (specify).....96                                                   |  |
| 431 | Is the cooking usually done in the house, in a separate building, or outdoors? | In the house . . . . . 1<br>In a separate building/room..... 2<br>Outdoors . . . . . 3<br>Other (specify).....96                                                                                    |  |
| 432 | What is the main material of the floor?                                        | Earth/sand . . . . . 1<br>Dung . . . . . 2<br>Unpolished wood..... 3<br>Polished wood . . . . .4<br>Cement . . . . . 5<br>Ceramic tiles . . . . . 6<br>Carpet . . . . . 7<br>Other (specify).....96 |  |
| 433 | What is the main material of the roof?                                         | No roof . . . . . 1<br>Thatch/leaf/mud . . . . . 2<br>Plastic sheets . . . . . 3<br>Wood . . . . .4<br>Corrugated iron /metal . . . . . 5<br>Cement/concrete . . . . . 6<br>Other (specify).....96  |  |
| 434 | What is the main material of the exterior walls?                               | No walls . . . . . 1<br>Cane/bamboo .....2<br>Bamboo/wood with mud..... 3<br>Stone with mud . . . . . 4<br>Uncovered adobe (earthen brick)..... 5<br>Cardboard . . . . . 6<br>Cement . . . . . 7    |  |

|     |                                                                                                                                           |                                                                                                                                             |                    |
|-----|-------------------------------------------------------------------------------------------------------------------------------------------|---------------------------------------------------------------------------------------------------------------------------------------------|--------------------|
|     |                                                                                                                                           | Stone with lime/cement . . . . .8<br>Bricks . . . . .9<br>Cement blocks . . . . .10<br>Covered adobe . . . . . 11<br>Other (specify).....96 |                    |
| 435 | How many rooms in your household are used for sleeping?                                                                                   |                                                                                                                                             |                    |
| 436 | Does any member of your household own a bicycle?                                                                                          | Yes.....1<br>No.....0                                                                                                                       |                    |
| 437 | Does any member of your household own a motorcycle?                                                                                       | Yes.....1<br>No.....0                                                                                                                       |                    |
| 438 | Does any member of your household own an animal-drawn cart?                                                                               | Yes.....1<br>No.....0                                                                                                                       |                    |
| 439 | Does any member of your household own a car or truck?                                                                                     | Yes.....1<br>No.....0                                                                                                                       |                    |
| 440 | Does any member of your household own any agricultural land?                                                                              | Yes.....1<br>No.....0                                                                                                                       | If 0, skip to Q445 |
| 441 | How many hectares of agricultural land do members of your household own?<br><br>1 hectare=10,000 m <sup>2</sup> e.g 100 meter x 100 meter | Yes.....1<br>No.....0                                                                                                                       |                    |
| 442 | What is the annual production of crops/ grains in quintal                                                                                 |                                                                                                                                             |                    |
| 443 | Does any member of your household own coffee plants?                                                                                      | Yes.....1<br>No.....0                                                                                                                       | If 0, skip to Q445 |
| 444 | How many kilograms of coffee do you get on average each year?                                                                             |                                                                                                                                             |                    |
| 445 | Does your household own any livestock, herds, other farm animals, or poultry?                                                             | Yes.....1<br>No.....0                                                                                                                       | If 0, skip to Q453 |
| 446 | How many milk cows, oxen or bulls do your household own?                                                                                  |                                                                                                                                             |                    |

|     |                                                                                                                                                                                    |                       |  |
|-----|------------------------------------------------------------------------------------------------------------------------------------------------------------------------------------|-----------------------|--|
|     | If none, enter '0'; If between 1-94, write the exact number; If more than 95, enter '95'; If unknown, enter '98'.                                                                  |                       |  |
| 447 | How many horses, donkeys, or mules do your household own?<br><br>If none, enter '0'; If between 1-94, write the exact number; If more than 95, enter '95'; If unknown, enter '98'. |                       |  |
| 448 | How many camels do your household own?<br><br>If none, enter '0'; If between 1-94, write the exact number; If more than 95, enter '95'; If unknown, enter '98'.                    |                       |  |
| 449 | How many goats do your household own?<br><br>If none, enter '0'; If between 1-94, write the exact number; If more than 95, enter '95'; If unknown, enter '98'.                     |                       |  |
| 450 | How many sheep do your household own?<br><br>If none, enter '0'; If between 1-94, write the exact number; If more than 95, enter '95'; If unknown, enter '98'.                     |                       |  |
| 451 | How many chickens do your household own?<br><br>If none, enter '0'; If between 1-94, write the exact number; If more than 95, enter '95'; If unknown, enter '98'.                  |                       |  |
| 452 | How many beehives do your household own?<br><br>If none, enter '0'; If between 1-94, write the exact number; If more than 95, enter '95'; If unknown, enter '98'.                  |                       |  |
| 453 | Does any member of your household have a bank or microfinance saving account?                                                                                                      | Yes.....1<br>No.....0 |  |

SECTION 4: CLINICAL BACKGROUND

(Get the information from the TB register)

| S.N | Questions and filters                                              | Coding category (Fill)                                                                               | Skip |
|-----|--------------------------------------------------------------------|------------------------------------------------------------------------------------------------------|------|
| 501 | Type of TB                                                         | Bacteriologically confirmed PTB...1<br>Clinically confirmed PTB...2<br>Clinically confirmed EPTB...3 |      |
| 502 | Type of treatment                                                  | New...1<br>Retreatment...2<br>MDR TB treatment...3                                                   |      |
| 503 | Date of treatment initiation (dd/mm/yyyy)<br>(Ethiopian Calendar ) | [ ]   [ ]   [ ]   [ ]<br><br>dd   mm   yyyy                                                          |      |
| 504 | Duration of TB treatment for the patient (In weeks)                |                                                                                                      |      |
| 505 | Co-morbid conditions                                               | HIV...1<br>DIABETES MELITUS...2<br>Asthma...3<br>Other (Specify).....96<br>No information....98      |      |

SECTION 5: KNOWLEDGE ON TB

| S.N | Questions and filters                                                                                                               | Coding category (Fill)                                                                                                                                                                                                                                                                                                                            | Skip            |
|-----|-------------------------------------------------------------------------------------------------------------------------------------|---------------------------------------------------------------------------------------------------------------------------------------------------------------------------------------------------------------------------------------------------------------------------------------------------------------------------------------------------|-----------------|
| 601 | Have you ever heard of an illness called TB?                                                                                        | Yes.....1<br>No.....0                                                                                                                                                                                                                                                                                                                             | If no, End here |
| 602 | Where did you first learn/hear about TB?<br><br>Record all mentioned.                                                               | Newspapers and magazines....1<br>Radio....2<br>TV....3<br>Billboards...4<br>Brochures, posters and other printed materials...5<br>Health extension workers...6<br>Other health workers...7<br>Health development armies...8<br>Family, friends, neighbors and colleagues...9<br>Religious leaders...10<br>Teachers...11<br>Other (Specify).....96 |                 |
| 603 | In your opinion, how serious a disease is TB?                                                                                       | Very serious...1<br>Somewhat serious...2<br>Not very serious...3                                                                                                                                                                                                                                                                                  |                 |
| 604 | How serious a problem do you think TB is in your community?                                                                         | Very serious...1<br>Somewhat serious...2<br>Not very serious...3                                                                                                                                                                                                                                                                                  |                 |
| 605 | What is the cause of TB? (Don't read the options to him/her. Check all the options mention by him/her)<br><br>Probe: Anything else? | Germs....1<br>Evil eye....2<br>Satan/witchcraft....3<br>Other (Specify).....96<br>Don't know.....99                                                                                                                                                                                                                                               |                 |
| 606 | How can a person get TB? (Don't read the options to him/her. Check all the options mention by him/her)                              | Through the air when coughing or sneezing ....1<br>Through sharing utensils....2<br>Through touching a person with TB.....3                                                                                                                                                                                                                       |                 |

|     |                                                                                                                                                                              |                                                                                                                                                                                                                                                                                          |  |
|-----|------------------------------------------------------------------------------------------------------------------------------------------------------------------------------|------------------------------------------------------------------------------------------------------------------------------------------------------------------------------------------------------------------------------------------------------------------------------------------|--|
|     | <p>Probe: Any other?</p>                                                                                                                                                     | <p>Through food or water....4</p> <p>Through sexual contact with a person with TB....5</p> <p>Through mosquito bites....6</p> <p>Through drinking un-boiled milk....7</p> <p>Exposure to cold....8</p> <p>Other (Specify).....96</p> <p>Don't know.....99</p>                            |  |
| 607 | <p>In your opinion, who can be infected with TB? (Don't read the options to him/her . Check all the options mention by him/her)</p> <p>Probe: Any other person?</p>          | <p>Anybody...1</p> <p>Only poor people...2</p> <p>Only homeless people....3</p> <p>Only alcoholics...4</p> <p>Only drug users...5</p> <p>Only people living with HIV/AIDS...6</p> <p>Only people who have been in prison...7</p> <p>Other (Specify).....96</p>                           |  |
| 608 | <p>What are the body parts affected with TB? (Don't read the options to him/her . Check all the options mention by him/her)</p> <p>Probe: Any other part of the body?</p>    | <p>Lung....1</p> <p>Intestine....2</p> <p>Bone....3</p> <p>Lymph nodes....4</p> <p>Other (Specify).....96</p> <p>Don't know.....99</p>                                                                                                                                                   |  |
| 609 | <p>What symptoms will a person with tuberculosis or TB have? (Don't read the options to him/her . Check all the options mention by him/her)</p> <p>Probe: Anything else?</p> | <p>Cough.....1</p> <p>Persistent cough (greater that two weeks).....2</p> <p>Weight loss.....3</p> <p>Poor appetite....4</p> <p>Night sweating.....5</p> <p>Chest pain.....6</p> <p>Fever.....7</p> <p>Blood in the sputum....8</p> <p>Shortness of breath....9</p> <p>Fatigue....10</p> |  |



|     |                                                                                                                                                                                |                                                                                                                                                                                                                                            |                          |
|-----|--------------------------------------------------------------------------------------------------------------------------------------------------------------------------------|--------------------------------------------------------------------------------------------------------------------------------------------------------------------------------------------------------------------------------------------|--------------------------|
|     |                                                                                                                                                                                | Swelling.....11<br>Other (Specify).....96<br>Don't know.....99                                                                                                                                                                             |                          |
| 610 | Is TB preventable disease?                                                                                                                                                     | Yes.....1<br>No.....0<br>Don't know.....99                                                                                                                                                                                                 | If 0 or 99, skip to Q612 |
| 611 | What possible TB transmission prevention methods are there?<br><br>(Don't read the options to him/her . Check all the options mention by him/her)<br><br>Probe: Anything else? | Avoiding cough in front of people....1<br>Safe disposal of sputum....2<br>Ventilation of living room....3<br>Avoiding close contact with TB patients....4<br>Vaccination for children.....5<br>Other (Specify).....96<br>Don't know.....99 |                          |
| 612 | Can TB be cured?                                                                                                                                                               | Yes.....1<br>No.....0<br>Don't know.....99                                                                                                                                                                                                 | If 0 or 99, skip to Q614 |
| 613 | How can someone with TB be cured?                                                                                                                                              | Herbal remedies...1<br>Home rest without medicine...2<br>Praying...3<br>Specific drugs given by health professionals...4<br>Other (Specify).....96<br>Don't know.....99                                                                    |                          |
| 614 | What is the duration of your TB treatment? (in months)<br><br>Write '99' if the response is 'I don't know'                                                                     |                                                                                                                                                                                                                                            |                          |
| 615 | Do you think that you are well informed about TB (on its prevention and control)?                                                                                              | Yes.....1<br>No.....0                                                                                                                                                                                                                      |                          |
| 616 | Do you wish to get more information about TB?                                                                                                                                  | Yes.....1<br>No.....0                                                                                                                                                                                                                      | If 0, Skip to Q701       |
| 617 | What are the sources of information that you think can most effectively reach people like you with information on TB? (Please choose the three most effective sources.)        | Newspapers and magazines...1<br>Radio...2<br>TV...3<br>Billboards...4                                                                                                                                                                      |                          |

|     |                                                                             |                                                                                                                                                                                                                                                                                                          |                    |
|-----|-----------------------------------------------------------------------------|----------------------------------------------------------------------------------------------------------------------------------------------------------------------------------------------------------------------------------------------------------------------------------------------------------|--------------------|
|     |                                                                             | Brochures, posters and other printed materials...5<br>Health extension workers...6<br>Other health workers...7<br>Health development armies...8<br>Family, friends, neighbours and colleagues...9<br>Religious leaders...10<br>Teachers...11<br>Other (Specify).....96                                   |                    |
| 618 | Have you ever heard about multidrug resistant TB?                           | Yes.....1<br>No.....0                                                                                                                                                                                                                                                                                    | If 0, Skip to Q701 |
| 619 | What do you know about multidrug resistant TB?<br><br>Probe: Anything else? | It is created when TB patients do not take anti-TB drugs regularly.....1<br><br>It is a dangerous form of TB...2<br><br>Can be transmitted to family and friends....3<br><br>Its treatment lasts for at least 2 years...4<br><br>Other (specify)_____5<br><br>Can not explain multidrug resistant TB...6 |                    |

SECTION 6: ATTITUDE AND STIGMA RELATED QUESTIONS

(Read the options to the participant and inform him/her to select one option only)

| S.N | Questions and filters                                                                                                                               | Coding category (Fill)                                                                                           | Skip                                                                    |
|-----|-----------------------------------------------------------------------------------------------------------------------------------------------------|------------------------------------------------------------------------------------------------------------------|-------------------------------------------------------------------------|
| 701 | Being a TB patient, others would think less of you.                                                                                                 | Strongly disagree.....1<br>Disagree.....2<br>Indifferent.....3<br>Agree.....4<br>Strongly agree.....5            |                                                                         |
| 702 | Being a TB patient, you would be ashamed/embarrassed.                                                                                               | Strongly disagree.....1<br>Disagree.....2<br>Indifferent.....3<br>Agree.....4<br>Strongly agree.....5            |                                                                         |
| 703 | Being a TB patient, others would avoid you.                                                                                                         | Strongly disagree.....1<br>Disagree.....2<br>Indifferent.....3<br>Agree.....4<br>Strongly agree.....5            |                                                                         |
| 704 | <i>Do you have partner?</i>                                                                                                                         | <i>Yes.....1<br/>No.....0</i>                                                                                    | <i>If 1, skip to Q706</i>                                               |
| 705 | <i>Only for the respondent who has no partner - Being a TB patient, you would have a problem of finding a partner for marriage even after cure.</i> | <i>Strongly disagree.....1<br/>Disagree.....2<br/>Indifferent.....3<br/>Agree.....4<br/>Strongly agree.....5</i> |                                                                         |
| 706 | <i>Only for the respondent who has partner- Being a TB patient, your partner would refuse to have sex with you.</i>                                 | <i>Strongly disagree.....1<br/>Disagree.....2<br/>Indifferent.....3<br/>Agree.....4<br/>Strongly agree.....5</i> | <i>Those who responded 0 to Q704 shall not respond to this question</i> |
| 707 | Being a TB patient, you would be asked to stay away from a social                                                                                   | Strongly disagree.....1                                                                                          |                                                                         |

|     |                                                                                                             |                                                                                                       |                    |
|-----|-------------------------------------------------------------------------------------------------------------|-------------------------------------------------------------------------------------------------------|--------------------|
|     | group.                                                                                                      | Disagree.....2<br>Indifferent.....3<br>Agree.....4<br>Strongly agree.....5                            |                    |
| 708 | Being a TB patient, you would not disclose even to a confidant (Somebody to whom secrets are usually told). | Strongly disagree.....1<br>Disagree.....2<br>Indifferent.....3<br>Agree.....4<br>Strongly agree.....5 |                    |
| 709 | Being a TB patient, you would think less of yourself                                                        | Strongly disagree.....1<br>Disagree.....2<br>Indifferent.....3<br>Agree.....4<br>Strongly agree.....5 |                    |
| 710 | Being a TB patient, others would think less of your family                                                  | Strongly disagree.....1<br>Disagree.....2<br>Indifferent.....3<br>Agree.....4<br>Strongly agree.....5 |                    |
| 711 | Do you have children?                                                                                       | Yes...1<br>No..0                                                                                      | If '0' skip to 713 |
| 712 | Being a TB patient, it would be a problem for your children                                                 | Strongly disagree.....1<br>Disagree.....2<br>Indifferent.....3<br>Agree.....4<br>Strongly agree.....5 |                    |
| 713 | Being a TB patient, you would be less likely to find a job.                                                 | Strongly disagree.....1<br>Disagree.....2<br>Indifferent.....3<br>Agree.....4<br>Strongly agree.....5 |                    |

|     |                                              |                                                                                                       |  |
|-----|----------------------------------------------|-------------------------------------------------------------------------------------------------------|--|
| 714 | Being a TB patient, you would lose your job. | Strongly disagree.....1<br>Disagree.....2<br>Indifferent.....3<br>Agree.....4<br>Strongly agree.....5 |  |
|-----|----------------------------------------------|-------------------------------------------------------------------------------------------------------|--|

SECTION 7: PERCEPTION AS TB PATIENT ON OTHER TB PATIENTS, ON TB IN GENERAL, AND SATISFACTION ON HEALTH SERVICES

| S.N | Questions and filters                                                                                                         | Coding category (Fill)                                                                                | Skip |
|-----|-------------------------------------------------------------------------------------------------------------------------------|-------------------------------------------------------------------------------------------------------|------|
| 801 | Family members are cooperative towards me. (Read the options to the participant and inform him/her to select one option only) | Strongly disagree.....1<br>Disagree.....2<br>Indifferent.....3<br>Agree.....4<br>Strongly agree.....5 |      |
| 802 | I have increased sadness. (Read the options to the participant and inform him/her to select one option only)                  | Strongly disagree.....1<br>Disagree.....2<br>Indifferent.....3<br>Agree.....4<br>Strongly agree.....5 |      |
| 803 | Utensils are separated for me. (Read the options to the participant and inform him/her to select one option only)             | Strongly disagree.....1<br>Disagree.....2<br>Indifferent.....3<br>Agree.....4<br>Strongly agree.....5 |      |
| 804 | I have fear of reduction of family income. (Read the options to the participant and inform him/her to select one option only) | Strongly disagree.....1<br>Disagree.....2<br>Indifferent.....3<br>Agree.....4<br>Strongly agree.....5 |      |
| 805 | Threat of loss of job/wages. (Read the options to the participant and inform him/her to select one option only)               | Strongly disagree.....1<br>Disagree.....2<br>Indifferent.....3<br>Agree.....4<br>Strongly agree.....5 |      |
| 806 | Most people behave differently. (Read the options to the participant and inform him/her to select one option only)            | Strongly disagree.....1<br>Disagree.....2<br>Indifferent.....3                                        |      |

|     |                                                                                                                                                                                                                            |                                                                                                                                                                                                                                                                                                                                  |  |
|-----|----------------------------------------------------------------------------------------------------------------------------------------------------------------------------------------------------------------------------|----------------------------------------------------------------------------------------------------------------------------------------------------------------------------------------------------------------------------------------------------------------------------------------------------------------------------------|--|
|     |                                                                                                                                                                                                                            | Agree.....4<br>Strongly agree.....5                                                                                                                                                                                                                                                                                              |  |
| 807 | Feel isolated within the family. (Read the options to the participant and inform him/her to select one option only)                                                                                                        | Strongly disagree.....1<br>Disagree.....2<br>Indifferent.....3<br>Agree.....4<br>Strongly agree.....5                                                                                                                                                                                                                            |  |
| 808 | Family members avoid me. (Read the options to the participant and inform him/her to select one option only)                                                                                                                | Strongly disagree.....1<br>Disagree.....2<br>Indifferent.....3<br>Agree.....4<br>Strongly agree.....5                                                                                                                                                                                                                            |  |
| 809 | Which statement is closest to your feeling about people with TB disease?<br><br>(Read the options to the participant and inform him/her to select one option only)                                                         | I feel compassion and desire to help....1<br><br>I feel compassion but I tend to stay away from these people....2<br><br>It is their problem and I do not want to get TB by trying to help them...3<br><br>I fear them because they may re-infect me....4<br><br>I have no particular feeling....5<br><br>Other (Specify).....96 |  |
| 810 | The health care providers are supportive and respectful of people who have TB. (Read the options to the participant and inform him/her to select one option only)                                                          | Strongly disagree.....1<br>Disagree.....2<br>Indifferent.....3<br>Agree.....4<br>Strongly agree.....5                                                                                                                                                                                                                            |  |
| 811 | Before coming for diagnosis/ treatment, you expected that the providers would be supportive and respectful of people who have TB. (Read the options to the participant and inform him/her to select one option only)       | Strongly disagree.....1<br>Disagree.....2<br>Indifferent.....3<br>Agree.....4<br>Strongly agree.....5                                                                                                                                                                                                                            |  |
| 812 | Most people in your community believe that they will be treated supportively and respectfully by health care providers if they have TB. (Read the options to the participant and inform him/her to select one option only) | Strongly disagree.....1<br>Disagree.....2                                                                                                                                                                                                                                                                                        |  |

|     |                                                                                                                                                                                                                                                       |                                                                                                       |  |
|-----|-------------------------------------------------------------------------------------------------------------------------------------------------------------------------------------------------------------------------------------------------------|-------------------------------------------------------------------------------------------------------|--|
|     | option only)                                                                                                                                                                                                                                          | Indifferent.....3<br>Agree.....4<br>Strongly agree.....5                                              |  |
| 813 | You are happy with the service you are getting from this facility. (Read the options to the participant and inform him/her to select one option only)                                                                                                 | Strongly disagree.....1<br>Disagree.....2<br>Indifferent.....3<br>Agree.....4<br>Strongly agree.....5 |  |
| 814 | How did you find the level of service you are getting from this facility comparing to your expectations before getting the health service in this health facility? (Read the options to the participant and inform him/her to select one option only) | Better than you expected...1<br>About what you expected...2<br>Not as good as you expected...3        |  |
| 815 | Health care workers answered all of your questions concerning TB. (Read the options to the participant and inform him/her to select one option only)                                                                                                  | Strongly disagree.....1<br>Disagree.....2<br>Indifferent.....3<br>Agree.....4<br>Strongly agree.....5 |  |
| 816 | You are satisfied with health post/health center schedule. (Read the options to the participant and inform him/her to select one option only)                                                                                                         | Strongly disagree.....1<br>Disagree.....2<br>Indifferent.....3<br>Agree.....4<br>Strongly agree.....5 |  |
| 817 | You are satisfied with waiting time in the health post/health center. (Read the options to the participant and inform him/her to select one option only)                                                                                              | Strongly disagree.....1<br>Disagree.....2<br>Indifferent.....3<br>Agree.....4<br>Strongly agree.....5 |  |
| 818 | You are satisfied with the availability of drugs at the health center. (Read the options to the participant and inform him/her to select one option only)                                                                                             | Strongly disagree.....1<br>Disagree.....2<br>Indifferent.....3<br>Agree.....4                         |  |



|     |                                                                                                                                        |                                                                                                       |                    |
|-----|----------------------------------------------------------------------------------------------------------------------------------------|-------------------------------------------------------------------------------------------------------|--------------------|
|     |                                                                                                                                        | Strongly agree.....5                                                                                  |                    |
| 819 | Do you have TB treatment supporter?                                                                                                    | Yes...1<br>No...0                                                                                     | If '0' skip to 901 |
| 820 | You are satisfied with your TB treatment supporter. (Read the options to the participant and inform him/her to select one option only) | Strongly disagree.....1<br>Disagree.....2<br>Indifferent.....3<br>Agree.....4<br>Strongly agree.....5 |                    |

SECTION 8: PRACTICE RELATED QUESTIONS

| S.N | Questions and filters                                                                                                                                                                                                   | Coding category (Fill)                                                                                                                                                                                                                                                                                                                                                                                                        | Skip                                     |
|-----|-------------------------------------------------------------------------------------------------------------------------------------------------------------------------------------------------------------------------|-------------------------------------------------------------------------------------------------------------------------------------------------------------------------------------------------------------------------------------------------------------------------------------------------------------------------------------------------------------------------------------------------------------------------------|------------------------------------------|
| 901 | How long have you stayed with the signs and symptoms of TB (Cough, fever, night sweats, chest pain, hemoptysis, lump, etc) until you first sought care in health institution? (in days starting from onset of symptoms) |                                                                                                                                                                                                                                                                                                                                                                                                                               | Skip to '903' if it is less than 30 days |
| 902 | What factors made you delay seeking treatment for symptoms that led to the diagnosis of TB? (More than one answer possible)                                                                                             | Not aware of the severity of my symptoms...1<br>Fear of rejection/ losing my job...2<br>Fear that treatment is expensive...3<br>Lack of time...4<br>Difficult access to health center/transportation issues...5<br>Not having a previous satisfactory experience with the health system...6<br>I feel that there was no delay in seeking treatment for symptoms that led to the diagnosis of TB...7<br>Other (specify).....96 |                                          |
| 903 | How long did it take since you first sought health attention until diagnosis of TB? (in days)                                                                                                                           |                                                                                                                                                                                                                                                                                                                                                                                                                               |                                          |
| 904 | How long did it take from diagnosis of TB to beginning treatment? (in days)                                                                                                                                             |                                                                                                                                                                                                                                                                                                                                                                                                                               |                                          |
| 905 | Did you seek any advice from drug vendors, traditional or spiritual healers before visiting health institution?                                                                                                         | Yes.....1<br>No.....0                                                                                                                                                                                                                                                                                                                                                                                                         | If 0, skip to Q907                       |
| 906 | Which healers did you visit before visiting health institution? (More than one answer possible)                                                                                                                         | Private drug vendors.....1<br>Religious leaders.....2<br>Traditional healers.....3<br>Other (specify).....96                                                                                                                                                                                                                                                                                                                  |                                          |
| 907 | Were you first seen by Health Extension Worker for the current complaint and referred by HEW to health facility?                                                                                                        | Yes.....1<br>No.....0                                                                                                                                                                                                                                                                                                                                                                                                         |                                          |
| 908 | Health facility you first diagnosed with TB.                                                                                                                                                                            | In the same health facility.....1<br>Referred from government hospital.....2<br>Referred from government Health Center.....3<br>Referred from private health facility .....4<br>Referred from NGO health facility.....5<br>Other (specify).....96                                                                                                                                                                             |                                          |
| 909 | Who do you think can better reduce the delay in the diagnosis and treatment for                                                                                                                                         | The patient...1                                                                                                                                                                                                                                                                                                                                                                                                               |                                          |

|     |                                                                                              |                                                                                                                                                                                                                                                                                                                                                                                                 |                    |
|-----|----------------------------------------------------------------------------------------------|-------------------------------------------------------------------------------------------------------------------------------------------------------------------------------------------------------------------------------------------------------------------------------------------------------------------------------------------------------------------------------------------------|--------------------|
|     | TB? (More than one option possible)                                                          | The family...2<br>The health system...3<br>The government...4<br>Other (specify).....96                                                                                                                                                                                                                                                                                                         |                    |
| 910 | How long have you taken the TB medicine? (in weeks)                                          |                                                                                                                                                                                                                                                                                                                                                                                                 |                    |
| 911 | Where do you currently take the TB drugs on daily basis                                      | In the health center.....1<br>In the health post.....2<br>At home....3<br>Other (specify).....96                                                                                                                                                                                                                                                                                                |                    |
| 912 | How far is the HC or HP from your house? (In minutes)                                        |                                                                                                                                                                                                                                                                                                                                                                                                 |                    |
| 913 | How frequently do you visit the health facility for your current treatment?                  | Every day.....1<br>Every week.....2<br>Every 2 weeks.....3<br>Every month.....4<br>Every 2 months.....5<br>Every 3 months....6<br>Every more than 3 months....7                                                                                                                                                                                                                                 |                    |
| 914 | Are you taking the drugs without interruption?                                               | Yes.....1<br>No.....0                                                                                                                                                                                                                                                                                                                                                                           | If 1, Skip to Q917 |
| 915 | If you have interrupted the drugs, how long have you interrupted? (in week)                  |                                                                                                                                                                                                                                                                                                                                                                                                 |                    |
| 916 | What were the reasons for interrupting to take the TB drugs? (More than one option possible) | There was no drug at the health facility...1<br>I developed side effects of the drugs...2<br>I went to traditional healers/holly water...3<br>Health facility is too far.....4<br><i>I have been outside my residence area for social reasons....5</i><br><i>I was too weak to come to the health facility/there was no one who can collect the drugs for me....6</i><br>Other (specify).....96 |                    |
| 917 | Is there anyone who observes you when you take the drugs daily?                              | Yes.....1<br>No.....0                                                                                                                                                                                                                                                                                                                                                                           | If 0, Skip to Q919 |
| 918 | Who observe you when you take the drugs daily?                                               | Health professionals at health center.....1<br>Health extension workers.....2<br>TB treatment supporter who is family member.....3                                                                                                                                                                                                                                                              |                    |

|     |                                                                                                |                                                                                                                                                                                                                                   |                    |
|-----|------------------------------------------------------------------------------------------------|-----------------------------------------------------------------------------------------------------------------------------------------------------------------------------------------------------------------------------------|--------------------|
|     |                                                                                                | TB treatment supporter who is neighbour...4<br>TB treatment supporter who is community figure...5<br>Other (specify).....96                                                                                                       |                    |
| 919 | Have you informed any family member that you have TB?                                          | Yes.....1<br>No.....0                                                                                                                                                                                                             | If 0, Skip to Q921 |
| 920 | Among the family members, who did you inform that you have TB? (More than one option possible) | Husband.....1<br>Wife.....2<br>Sister/ Brother.....3<br>Son/ Daughter.....4<br>Other (specify).....96                                                                                                                             |                    |
| 921 | Have you informed anyone else who is not family member that you have TB?                       | Yes.....1<br>No.....0                                                                                                                                                                                                             | If 0, Skip to Q923 |
| 922 | Among people who are not family members, who did you inform that you have TB?                  | Religious leaders.....1<br>Neighbours.....2<br>Colleagues/friends at work place.....3<br>Friends who are not working with me.....4<br>Other (specify).....96                                                                      |                    |
| 923 | Is the health extension worker in your kebele communicated that you have TB?                   | Yes.....1<br>No.....0                                                                                                                                                                                                             | If 0, skip to Q925 |
| 924 | Who communicated the HEW about your TB?                                                        | Professionals at the health center....1<br>Myself by taking a note written by the professionals at the health center....2<br>Family member.....3<br>TB treatment supporter who is not family member...4<br>Other (Specify).....96 |                    |
| 925 | Are you eating more and a variety of food after you knew that you have TB?                     | Yes.....1<br>No.....0                                                                                                                                                                                                             |                    |
| 926 | Do you open windows/doors in your house after you knew that you have TB?                       | Yes.....1<br>No.....0                                                                                                                                                                                                             |                    |
| 927 | Do you open windows/doors in your work place after you knew that you have TB?                  | Yes.....2<br>No.....1<br>I have no work outside home.....0                                                                                                                                                                        |                    |
| 928 | Is your weight checked regularly?                                                              | Yes.....1                                                                                                                                                                                                                         |                    |

|     |                                                                                                                                                                                                                                     |                       |                    |
|-----|-------------------------------------------------------------------------------------------------------------------------------------------------------------------------------------------------------------------------------------|-----------------------|--------------------|
|     |                                                                                                                                                                                                                                     | No.....0              |                    |
| 929 | Were there times that the health professionals informed you that your weight is lower than expected?                                                                                                                                | Yes.....1<br>No.....0 | If 0, Skip to Q931 |
| 930 | If your weight was lower than expected, did you receive any nutritional support from the health facilities?                                                                                                                         | Yes.....1<br>No.....0 |                    |
| 931 | Do you cover your mouth when coughing?                                                                                                                                                                                              | Yes.....1<br>No.....0 |                    |
| 932 | Have you informed family members to go to the health institutions for investigation?                                                                                                                                                | Yes.....1<br>No.....0 | If 0, Skip to Q942 |
| 933 | Did they go for investigation?                                                                                                                                                                                                      | Yes.....1<br>No.....0 | If 0, Skip to Q942 |
| 934 | How many family members were investigated? <i>Write 98 if he/she has no family</i>                                                                                                                                                  |                       |                    |
| 935 | How many children under-five years were investigated? <i>Write '0' if there was no under-five years old child who is investigated Write 98 if he/she has no children</i>                                                            |                       |                    |
| 936 | How many people age 5 years to less than 18 years were investigated?<br><i>Write '0' if there was no person age 5 years to less than 18 years old who is investigated</i><br><i>Write 98 if he/she has no person age 5-18 years</i> |                       |                    |
| 937 | How many adults (18 and more years old) were investigated? <i>Write '0' if there was no adult who is investigated</i><br><i>Write 98 if he/she has no adult</i>                                                                     |                       |                    |
| 938 | Were there any family member diagnosed to have TB after the investigation?                                                                                                                                                          | Yes.....1<br>No.....0 | If 0, Skip to Q942 |
| 939 | How many children under-five years of age were diagnosed to have TB after the investigation?<br><i>Write '0' if there was no under-five year old child who is diagnosed to have TB</i>                                              |                       |                    |
| 940 | How many people age 5 years to less than 18 years were diagnosed to have TB after the investigation?<br><i>Write '0' if there was no person age 5 years to less than 18 years who is diagnosed to have TB</i>                       |                       |                    |
| 941 | How many adults (18 and more years) were diagnosed to have TB after the investigation? <i>Write '0' if there was no adult who is diagnosed to have TB</i>                                                                           |                       |                    |
| 942 | Are there children whose age is under-five years in your family?                                                                                                                                                                    | Yes.....1<br>No.....0 | If 0, Skip to Q948 |
| 943 | Number of children under-five years of age in the family                                                                                                                                                                            |                       |                    |
| 944 | Did the children under-five years old get preventive therapy for TB?                                                                                                                                                                | Yes.....1<br>No.....0 | If 0, Skip to Q946 |

|     |                                                                                                    |                                                                                                                          |                                |
|-----|----------------------------------------------------------------------------------------------------|--------------------------------------------------------------------------------------------------------------------------|--------------------------------|
| 945 | How many children under-five years old get preventive therapy for TB?                              |                                                                                                                          |                                |
| 946 | Is there a child whose age is under one year in the family?                                        | Yes.....1<br>No.....0                                                                                                    | If 0, Skip to Q948             |
| 947 | Is he/she vaccinated for TB                                                                        | Yes.....1<br>No.....0                                                                                                    |                                |
| 948 | Are there family members in the house who have HIV?                                                | Yes.....2<br>No.....1<br><i>I don't know.....0.</i>                                                                      | <i>If 1 or 0, Skip to Q950</i> |
| 949 | Did these family members who have <i>HIV</i> get preventive therapy for TB?                        | Yes.....1<br>No.....0                                                                                                    |                                |
| 950 | Did any of the following happen on you after developing TB disease?<br><br>(Check all that apply.) | Lost job...1<br>Reduction in income...2<br>Divorce...3<br>Interrupted school...4<br>Nothing...5<br>Other (Specify)....96 |                                |

End of questions

Thank you very much for your cooperation
