# Supplementary material for: Knowledge, attitudes, and practices related to TB among the general population of Ethiopia: Findings from a national cross-sectional survey
Source: PubMed Central journal article supplement (PMC6816561; doi:10.1371/journal.pone.0224196), 2019-10-28
Supplement: pone.0224196.s003.pdf [file pone.0224196.s003.pdf]

Supporting table 3 Knowledge about cause and risk of TB in Ethiopia, 2017

| Variables                         |                                         | General population |      | TB patients |      | Families of TB patients |      | Total    |      |
|-----------------------------------|-----------------------------------------|--------------------|------|-------------|------|-------------------------|------|----------|------|
|                                   |                                         | N=1,783            |      | N=844       |      | N=836                   |      | N= 3,463 |      |
|                                   |                                         | N                  | %    | N           | %    | N                       | %    | N        | %    |
| Have you ever heard of TB?        | Yes                                     | 1,668              | 93.6 | 823         | 97.5 | 815                     | 97.5 | 3,306    | 95.5 |
|                                   | No                                      | 115                | 6.5  | 21          | 2.5  | 21                      | 2.5  | 157      | 4.5  |
| Cause of TB                       | Germs                                   | 502                | 28.2 | 224         | 26.6 | 260                     | 31.1 | 986      | 28.5 |
|                                   | Evil eye                                | 6                  | 0.3  | 4           | 0.5  | 4                       | 0.5  | 14       | 0.4  |
|                                   | Satan/witchcraft                        | 22                 | 1.2  | 7           | 0.8  | 8                       | 1.0  | 37       | 1.1  |
|                                   | Other causes                            | 347                | 19.5 | 164         | 19.4 | 179                     | 21.4 | 690      | 19.9 |
|                                   | Don't know                              | 810                | 45.4 | 436         | 51.7 | 380                     | 45.5 | 1,626    | 47.0 |
| How can a person get TB?          | Through air (coughing and sneezing)     | 1,238              | 69.4 | 586         | 69.4 | 600                     | 71.8 | 2,424    | 70.0 |
|                                   | Sharing utensils                        | 655                | 36.7 | 332         | 39.3 | 329                     | 39.4 | 1,316    | 38.0 |
|                                   | Touching a person with TB               | 215                | 12.1 | 96          | 11.4 | 115                     | 13.8 | 426      | 12.3 |
|                                   | Through food or water                   | 245                | 13.7 | 115         | 13.3 | 120                     | 14.4 | 480      | 13.9 |
|                                   | Sexual contact TB case                  | 141                | 7.9  | 65          | 7.7  | 69                      | 8.3  | 275      | 7.9  |
|                                   | Mosquito bites                          | 29                 | 1.6  | 11          | 1.3  | 10                      | 1.2  | 50       | 1.4  |
|                                   | Drinking raw milk                       | 83                 | 4.7  | 30          | 3.6  | 48                      | 5.7  | 161      | 4.7  |
|                                   | Exposure to cold                        | 165                | 9.3  | 110         | 13.0 | 99                      | 11.8 | 374      | 10.8 |
|                                   | Others                                  | 48                 | 2.7  | 7           | 0.8  | 15                      | 1.8  | 70       | 2.0  |
|                                   | Don't know                              | 226                | 12.7 | 131         | 15.5 | 115                     | 13.8 | 472      | 13.6 |
| Who can be infected with TB?      | Anybody                                 | 1,291              | 72.4 | 669         | 79.3 | 667                     | 79.8 | 2,627    | 75.9 |
|                                   | Only poor people                        | 249                | 14.0 | 148         | 17.5 | 134                     | 16.0 | 531      | 15.3 |
|                                   | Only homeless people                    | 148                | 8.3  | 73          | 8.7  | 71                      | 8.5  | 292      | 8.4  |
|                                   | Only alcoholics                         | 179                | 10.0 | 75          | 8.9  | 72                      | 8.6  | 326      | 9.4  |
|                                   | Only drug users                         | 115                | 6.5  | 59          | 7.0  | 43                      | 5.1  | 217      | 6.3  |
|                                   | Only those living with HIV              | 115                | 6.5  | 47          | 5.6  | 48                      | 5.7  | 210      | 6.1  |
|                                   | Only those who have been in prison      | 39                 | 2.2  | 11          | 1.0  | 4                       | 0.5  | 54       | 1.6  |
| Others                            | 137                                     | 7.7                | 44   | 5.2         | 35   | 4.2                     | 216  | 6.2      |      |
| Body parts affected with TB       | Lung                                    | 1,344              | 75.4 | 728         | 86.3 | 699                     | 83.6 | 2,771    | 80.0 |
|                                   | Intestine                               | 118                | 6.6  | 86          | 10.2 | 86                      | 10.3 | 290      | 8.4  |
|                                   | Bone                                    | 342                | 19.2 | 236         | 28.0 | 229                     | 27.4 | 807      | 23.3 |
|                                   | Lymph nodes                             | 101                | 5.7  | 90          | 10.7 | 81                      | 9.7  | 272      | 7.9  |
|                                   | Others                                  | 81                 | 4.5  | 24          | 2.8  | 17                      | 2.0  | 122      | 3.5  |
|                                   | Don't know                              | 237                | 13.3 | 57          | 6.8  | 88                      | 10.5 | 382      | 11.0 |
| Symptoms of TB                    | Cough                                   | 1,333              | 74.8 | 690         | 81.8 | 690                     | 82.5 | 2,713    | 78.3 |
|                                   | Persistent cough                        | 396                | 22.2 | 202         | 23.9 | 190                     | 22.7 | 788      | 22.8 |
|                                   | Weight loss                             | 677                | 38.0 | 361         | 42.8 | 373                     | 44.6 | 1,411    | 40.8 |
|                                   | Poor appetite                           | 336                | 18.8 | 249         | 29.5 | 238                     | 28.5 | 823      | 23.8 |
|                                   | Night sweating                          | 263                | 14.8 | 193         | 22.9 | 192                     | 23.0 | 648      | 18.7 |
|                                   | Chest pain                              | 250                | 14.0 | 187         | 22.2 | 159                     | 19.0 | 596      | 17.2 |
|                                   | Fever                                   | 250                | 14.0 | 178         | 21.1 | 165                     | 19.7 | 593      | 17.1 |
|                                   | Blood in the sputum                     | 255                | 14.3 | 114         | 13.5 | 96                      | 11.5 | 465      | 13.4 |
|                                   | Shortness of breath                     | 110                | 6.2  | 62          | 7.4  | 45                      | 5.4  | 217      | 6.3  |
|                                   | Fatigue                                 | 187                | 10.5 | 152         | 18.0 | 98                      | 11.7 | 437      | 12.6 |
|                                   | Swelling                                | 96                 | 5.4  | 87          | 10.3 | 68                      | 8.1  | 251      | 7.3  |
|                                   | Others                                  | 28                 | 1.6  | 21          | 2.5  | 8                       | 1.0  | 57       | 1.7  |
| Don't know                        | 123                                     | 6.9                | 13   | 1.5         | 27   | 3.2                     | 163  | 4.7      |      |
| Is TB preventable?                | Yes                                     | 1,347              | 75.6 | 627         | 74.3 | 664                     | 79.4 | 2,638    | 76.2 |
|                                   | No                                      | 114                | 6.4  | 65          | 7.7  | 64                      | 7.7  | 243      | 7.0  |
|                                   | Do not know                             | 207                | 11.6 | 131         | 15.5 | 87                      | 10.4 | 425      | 12.3 |
| Prevention methods                | Avoiding cough in front of people       | 923                | 51.8 | 455         | 53.9 | 495                     | 59.2 | 1,873    | 54.1 |
|                                   | Safe disposal of sputum                 | 425                | 23.8 | 217         | 25.7 | 210                     | 25.1 | 852      | 24.6 |
|                                   | Ventilation of living room              | 300                | 16.8 | 137         | 16.2 | 171                     | 20.4 | 608      | 17.5 |
|                                   | Avoiding close contact with TB patients | 524                | 29.4 | 268         | 31.8 | 273                     | 32.6 | 1,065    | 30.8 |
|                                   | Vaccination of children                 | 97                 | 5.4  | 33          | 3.9  | 40                      | 4.8  | 170      | 4.9  |
|                                   | Others                                  | 179                | 10.0 | 55          | 6.5  | 51                      | 6.1  | 285      | 8.2  |
|                                   | Don't know                              | 112                | 6.3  | 50          | 5.9  | 44                      | 5.3  | 206      | 6.0  |
| TB can be cured?                  | Yes                                     | 1,506              | 84.5 | 788         | 93.4 | 784                     | 93.8 | 3,078    | 88.9 |
|                                   | No                                      | 54                 | 3.0  | 3           | 0.4  | 6                       | 0.7  | 63       | 1.8  |
|                                   | I don't know                            | 108                | 6.1  | 32          | 3.8  | 25                      | 3.0  | 165      | 4.8  |
| How can someone with TB be cured? | Specific drugs given by health workers  | 1,439              | 80.7 | 761         | 90.2 | 753                     | 90.1 | 2,953    | 85.3 |
|                                   | Home rest without medicine              | 45                 | 2.5  | 18          | 2.1  | 21                      | 2.5  | 84       | 2.4  |
|                                   | Praying                                 | 4                  | 0.2  | 2           | 0.2  | 1                       | 0.1  | 7        | 0.2  |
|                                   | Others*                                 | 3                  | 0.2  | 2           | 0.2  | 0                       | 0.0  | 5        | 0.2  |
|                                   | Don't know                              | 15                 | 0.8  | 5           | 0.6  | 9                       | 1.1  | 29       | 0.8  |
