# Supplementary material for: Knowledge, attitudes, and practices related to TB among the general population of Ethiopia: Findings from a national cross-sectional survey
Source: PubMed Central journal article supplement (PMC6816561; doi:10.1371/journal.pone.0224196), 2019-10-28
Supplement: pone.0224196.s004.pdf [file pone.0224196.s004.pdf]

**Supporting table 4 Knowledge and source of information about TB in Ethiopia, 2017**

| Variables                                      |                                                             | General population |      | Families of TB patients |      | TB patients |      |
|------------------------------------------------|-------------------------------------------------------------|--------------------|------|-------------------------|------|-------------|------|
|                                                |                                                             | N                  | %    | N                       | %    | N           | %    |
| Ever heard of TB                               |                                                             | 1668               | 93.6 | 815                     | 97.5 | 823         | 97.5 |
| First source of information about TB           | Newspapers and magazines                                    | 26                 | 1.6  | 11                      | 1.3  | 8           | 1.0  |
|                                                | Radio                                                       | 605                | 36.3 | 274                     | 33.6 | 235         | 28.6 |
|                                                | TV                                                          | 586                | 35.1 | 273                     | 33.5 | 227         | 27.6 |
|                                                | Billboards                                                  | 24                 | 1.4  | 13                      | 1.6  | 10          | 1.2  |
|                                                | Brochures, posters and other print medias                   | 65                 | 3.9  | 49                      | 6.0  | 42          | 5.1  |
|                                                | HEWs                                                        | 507                | 30.4 | 223                     | 27.4 | 227         | 27.6 |
|                                                | Other Health Workers                                        | 367                | 22   | 261                     | 32.0 | 272         | 33.0 |
|                                                | HDA's                                                       | 128                | 7.7  | 79                      | 9.7  | 79          | 9.6  |
|                                                | Family, friends, neighbors and colleagues                   | 891                | 53.4 | 442                     | 54.2 | 450         | 54.7 |
|                                                | Religious leaders                                           | 62                 | 3.7  | 29                      | 3.2  | 24          | 2.9  |
|                                                | Teachers                                                    | 175                | 10.5 | 86                      | 10.6 | 70          | 8.5  |
|                                                | Others                                                      | 11                 | 0.6  | 11                      | 1.3  | 5           | 0.6  |
|                                                | Well informed on TB                                         |                    | 460  | 27.6                    | 268  | 32.9        | 240  |
| Wished to get more information on TB           |                                                             | 1547               | 92.7 | 744                     | 91.3 | 746         | 90.6 |
| Perceived to be effective information source   | Newspapers and magazines                                    | 89                 | 5.8  | 33                      | 4.4  | 34          | 4.6  |
|                                                | Radio                                                       | 862                | 55.7 | 414                     | 55.6 | 399         | 53.5 |
|                                                | TV                                                          | 809                | 52.3 | 348                     | 46.8 | 331         | 44.4 |
|                                                | Billboards                                                  | 31                 | 2.0  | 16                      | 2.2  | 17          | 2.3  |
|                                                | Brochures, posters and other print medias                   | 135                | 8.7  | 71                      | 9.5  | 56          | 7.5  |
|                                                | HEWs                                                        | 986                | 63.7 | 450                     | 60.5 | 455         | 61.0 |
|                                                | Other Health Workers                                        | 676                | 43.7 | 405                     | 54.4 | 413         | 55.4 |
|                                                | HDA's                                                       | 260                | 16.8 | 125                     | 16.8 | 126         | 16.9 |
|                                                | Family, friends, neighbors and colleagues                   | 382                | 24.7 | 206                     | 27.7 | 220         | 29.5 |
|                                                | Religious leaders                                           | 198                | 12.8 | 80                      | 10.8 | 98          | 13.1 |
| Teachers                                       | 184                                                         | 11.9               | 79   | 10.6                    | 79   | 10.6        |      |
| Others                                         | 29                                                          | 1.9                | 5    | 0.7                     | 10   | 1.3         |      |
| Heard of multidrug resistance TB               |                                                             | 349                | 20.9 | 206                     | 25.3 | 238         | 28.9 |
| What do you know about multidrug resistant TB? | Created when TB patients don't take anti-TB drugs regularly | 266                | 76.2 | 157                     | 76.2 | 180         | 75.6 |
|                                                | It is dangerous form of TB                                  | 138                | 39.5 | 95                      | 46.1 | 79          | 33.2 |
|                                                | Can be transmitted to family and friends                    | 50                 | 14.3 | 22                      | 10.7 | 17          | 7.1  |
|                                                | Its treatment lasts for at least 2 years                    | 33                 | 9.5  | 19                      | 9.2  | 22          | 9.2  |
|                                                | Not curable/Getting TB disease again                        | 4                  | 1.1  | 21                      | 10.2 | 3           | 1.3  |
|                                                | Cannot explain                                              | 34                 | 9.7  | 157                     | 76.2 | 34          | 14.3 |
