# Supplementary material for: Knowledge, attitudes, and practices related to TB among the general population of Ethiopia: Findings from a national cross-sectional survey
Source: PubMed Central journal article supplement (PMC6816561; doi:10.1371/journal.pone.0224196), 2019-10-28
Supplement: pone.0224196.s005.pdf [file pone.0224196.s005.pdf]

**Supporting table 5 Factors associated with knowledge about TB in the general population in Ethiopia, 2017**

| Variables |                            | Knowledge High | Knowledge Low | COR (95% CI)    | AOR (95%CI)      |
|-----------|----------------------------|----------------|---------------|-----------------|------------------|
|           |                            | # (%)          | # (%)         |                 |                  |
| Gender    | Male                       | 424(54.2)      | 359(45.8)     | 1.36(1.12-1.65) | 1.38(1.12-1.71)* |
|           | Female                     | 411(46.4)      | 474(53.6)     | 1               | 1                |
| Education | Not able to read and write | 181(38.3)      | 292 (61.7)    | 1               | 1                |
|           | Read and write only        | 49(41.5)       | 69(58.5)      | 1.15(0.76-1.73) | 1.02(0.65-1.59)  |
|           | Primary                    | 236(48.6)      | 250(51.4)     | 1.52(1.18-1.97) | 1.33(1.0-1.77)*  |
|           | Secondary                  | 226(58.1)      | 163(41.9)     | 2.24(1.7-2.94)  | 1.85(1.36-2.52)* |
|           | Above secondary            | 143(70.8)      | 59(29.2)      | 3.91(2.74-5.58) | 3.17(2.11-4.75)* |
| Wealth    | Lowest                     | 100(32.7)      | 206(67.3)     | 0.25(0.18-0.35) | 0.33(0.22-0.49)* |
|           | Second                     | 148(46.0)      | 174(54.0)     | 0.44(0.32-0.6)  | 0.48(0.33-0.71)* |
|           | Third                      | 154(45.7)      | 183(54.3)     | 0.44(0.32-0.59) | 0.49(0.35-0.71)* |
|           | Fourth                     | 198(57.2)      | 148(42.8)     | 0.7(0.51-0.94)  | 0.76(0.54-1.07)  |
|           | Highest                    | 235(65.8)      | 122(34.2)     | 1               | 1                |
| Setting   | Rural                      | 308(41.7)      | 431(58.3)     | 0.55(0.45-0.66) | 0.82(0.64-1.04)  |
|           | Urban                      | 527(56.7)      | 402(43.3)     | 1               | 1                |
| Region    | Oromia                     | 205(62.3)      | 124(37.7)     | 1               | 1                |
|           | Amhara                     | 96(28.7)       | 239(71.3)     | 0.24(0.18-0.34) | 0.16(0.11-0.23)* |
|           | SNNP                       | 161(50.6)      | 157(49.4)     | 0.62(0.45-0.85) | 0.48(0.34-0.67)* |
|           | Tigray                     | 95(53.7)       | 82(46.3)      | 0.7(0.48-1.02)  | 0.55(0.37-0.81)* |
|           | Benshangul Gumuz           | 31(34.8)       | 58(65.2)      | 0.32(0.2-0.53)  | 0.29(0.18-0.49)* |
|           | Gambella                   | 45(54.9)       | 37(45.1)      | 0.74(0.45-1.2)  | 0.76(0.45-1.27)  |
|           | Addis Ababa                | 119(68.8)      | 54(31.2)      | 1.33(0.9-1.97)  | 0.68(0.44-1.06)  |
|           | Dire Dawa                  | 45(55.6)       | 36(44.4)      | 0.76(0.46-1.24) | 0.47(0.28-0.8)*  |
|           | Harari                     | 38(45.2)       | 46(54.8)      | 0.5(0.31-0.81)  | 0.34(0.2-0.57)*  |

\*P<0.05, The study participants were grouped as having high and low knowledge score using the mean knowledge score as a cut-off point.
