# Supplementary material for: Knowledge, attitudes, and practices related to TB among the general population of Ethiopia: Findings from a national cross-sectional survey
Source: PubMed Central journal article supplement (PMC6816561; doi:10.1371/journal.pone.0224196), 2019-10-28
Supplement: pone.0224196.s006.pdf [file pone.0224196.s006.pdf]

**Supporting table 6 Factors associated with knowledge about TB among families of TB patients in Ethiopia, 2017**

| Variables |                            | Knowledge High | Knowledge Low | COR (95% CI)    | AOR (95%CI)      |
|-----------|----------------------------|----------------|---------------|-----------------|------------------|
|           |                            | # (%)          | # (%)         |                 |                  |
| Gender    | Male                       | 176(48.6)      | 186(51.4)     | 1.29(0.97-1.72) | 1.15(0.83-1.59)  |
|           | Female                     | 164(42.3)      | 224(57.7)     | 1               | 1                |
| Education | Not able to read and write | 86(37.6)       | 143(62.4)     | 1               | 1                |
|           | Read and write only        | 20(41.7)       | 28(58.3)      | 1.19(0.63-2.24) | 1.76(0.87-3.55)  |
|           | Primary                    | 92(44.4)       | 115(55.6)     | 1.33(0.91-1.95) | 1.49(0.96-2.31)  |
|           | Secondary                  | 84(50.3)       | 83(49.7)      | 1.68(1.12-2.52) | 2.04(1.27-3.29)* |
|           | Above secondary            | 58(58.6)       | 41(41.4)      | 2.35(1.45-3.81) | 2.88(1.63-5.1)*  |
| Wealth    | Lowest                     | 53(39.0)       | 83(61.0)      | 0.6(0.38-0.95)  | 0.8(0.43-1.5)    |
|           | Second                     | 61(41.5)       | 86(58.5)      | 0.67(0.43-1.05) | 0.74(0.43-1.29)  |
|           | Third                      | 59(40.4)       | 87(59.6)      | 0.64(0.41-1.0)  | 0.71(0.42-1.19)  |
|           | Fourth                     | 84(52.5)       | 76(47.5)      | 1.04(0.67-1.61) | 1.0(0.63-1.63)   |
|           | Highest                    | 83(51.6)       | 78(48.4)      | 1               | 1                |
| Setting   | Rural                      | 104(39.1)      | 162(60.9)     | 0.68(0.5-0.91)  | 0.71(0.47-1.07)  |
|           | Urban                      | 236(48.8)      | 248(51.2)     | 1               | 1                |
| Region    | Oromia                     | 82(69.5)       | 36(30.5)      | 1               | 1                |
|           | Amhara                     | 39(25.0)       | 117(75.0)     | 0.15(0.09-0.25) | 0.09(0.05-0.16)* |
|           | SNNP                       | 60(38.0)       | 98(62.0)      | 0.27(0.16-0.45) | 0.23(0.14-0.39)* |
|           | Tigray                     | 37(44.0)       | 47(56.0)      | 0.35(0.19-0.62) | 0.22(0.12-0.43)* |
|           | Benshangul Gumuz           | 15(35.7)       | 27(64.3)      | 0.24(0.12-0.51) | 0.16(0.07-0.36)* |
|           | Gambella                   | 8(32.0)        | 17(68.0)      | 0.21(0.08-0.52) | 0.17(0.06-0.46)* |
|           | Addis Ababa                | 52(61.9)       | 32(38.1)      | 0.71(0.4-1.29)  | 0.41(0.21-0.79)* |
|           | Dire Dawa                  | 25(59.5)       | 17(40.5)      | 0.65(0.31-1.34) | 0.32(0.14-0.71)* |
|           | Harari                     | 22(53.7)       | 19(46.3)      | 0.51(0.25-1.05) | 0.35(0.16-0.77)* |

\*P<0.05, The study participants were grouped as having high and low knowledge score using the mean knowledge score as a cut-off point.
