# Supplementary material for: Knowledge, attitudes, and practices related to TB among the general population of Ethiopia: Findings from a national cross-sectional survey
Source: PubMed Central journal article supplement (PMC6816561; doi:10.1371/journal.pone.0224196), 2019-10-28
Supplement: pone.0224196.s007.pdf [file pone.0224196.s007.pdf]

**Supporting table 7 Factors associated with knowledge about TB among TB patients in Ethiopia, 2017**

| Variables |                            | Knowledge High | Knowledge Low | COR (95% CI)    | AOR (95% CI)     |
|-----------|----------------------------|----------------|---------------|-----------------|------------------|
|           |                            | # (%)          | # (%)         |                 |                  |
| Gender    | Male                       | 248(51.7)      | 232(48.3)     | 1.43(1.08-1.88) | 1.34(0.97-1.84)  |
|           | Female                     | 147(42.9)      | 196(57.1)     | 1               | 1                |
| Education | Not able to read and write | 116(40.8)      | 168(59.2)     | 1               | 1                |
|           | Read and write only        | 24(63.2)       | 14(36.8)      | 2.48(1.23-5.0)  | 2.14(0.98-4.68)  |
|           | Primary                    | 125(49.2)      | 129(50.8)     | 1.4(1.0-1.97)   | 1.3(0.88-1.93)   |
|           | Secondary                  | 84(51.5)       | 79(48.5)      | 1.54(1.05-2.27) | 1.65(1.03-2.63)* |
|           | Above secondary            | 46(54.8)       | 38(45.2)      | 1.75(1.07-2.86) | 2.11(1.16-3.85)* |
| Wealth    | Lowest                     | 61(38.6)       | 97(61.4)      | 0.54(0.35-0.84) | 0.53(0.29-0.98)* |
|           | Second                     | 84(51.2)       | 80(48.8)      | 0.9(0.58-1.38)  | 0.77(0.43-1.36)  |
|           | Third                      | 84(48.6)       | 89(51.4)      | 0.81(0.53-1.24) | 0.7(0.41-1.17)   |
|           | Fourth                     | 77(47.2)       | 86(52.8)      | 0.77(0.5-1.18)  | 0.74(0.45-1.2)   |
|           | Highest                    | 89(53.9)       | 76(46.1)      | 1               | 1                |
| Setting   | Rural                      | 150(44.1)      | 190(55.9)     | 0.77(0.58-1.0)  | 0.6(0.41-0.89)*  |
|           | Urban                      | 245(50.7)      | 238(49.3)     | 1               | 1                |
| Region    | Oromia                     | 129(76.8)      | 39(23.2)      | 1               | 1                |
|           | Amhara                     | 35(20.6)       | 135(79.4)     | 0.08(0.05-0.13) | 0.05(0.03-0.09)* |
|           | SNNP                       | 77(47.2)       | 86(52.8)      | 0.27(0.17-0.43) | 0.29(0.18-0.47)* |
|           | Tigray                     | 37(43.0)       | 49(57.0)      | 0.23(0.13-0.4)  | 0.16(0.09-0.29)* |
|           | Benshangul Gumuz           | 19(45.2)       | 23(54.8)      | 0.25(0.12-0.51) | 0.2(0.09-0.42)*  |
|           | Gambella                   | 12(42.9)       | 16(57.1)      | 0.23(0.1-0.52)  | 0.19(0.08-0.47)* |
|           | Addis Ababa                | 44(53.7)       | 38(46.3)      | 0.35(0.2-0.62)  | 0.18(0.09-0.34)* |
|           | Dire Dawa                  | 21(50.0)       | 21(50.0)      | 0.3(0.15-0.61)  | 0.17(0.08-0.38)* |
|           | Harari                     | 21(50.0)       | 21(50.0)      | 0.3(0.15-0.61)  | 0.22(0.1-0.48)*  |

\*P<0.05, the study participants were grouped as having high and low knowledge score using the mean knowledge score as a cut-off point.
